# Supplementary material
Source: publisher figshare collection journal article supplement (https://future-science-group.figshare.com/ndownloader/files/31161223)
Supplement: Supplementary file 1 [file 31161223]

## Sheet: Supp.Tab.1-ATAC.Diff.Bind.All
Cell-Type	ATAC_ID	Chr	Start	End	Strand	Annotation	Detailed Annotation	Distance to.TSS	Nearest PromoterID	CpG	widths	GC Percentage	1_ATAC	2_ATAC	3_ATAC	5_ATAC	7_ATAC	8_ATAC	9_ATAC	10_ATAC	11_ATAC	logFC	t.stat	p.value
CD4	chr10:104268925:104269262	chr10	104268925	104269262	+	promoter-TSS (NR_039702)	promoter-TSS (NR_039702)	220	NM_183239	0.083086	338	67	8.4818	8.62803	9.38469	9.56576	8.70716	8.52283	8.83959	8.46323	8.46323	0.555895	2.47348	0.0375821
CD4	chr10:31318762:31318898	chr10	31318762	31318898	+	promoter-TSS (NM_001323641)	promoter-TSS (NM_001323641)	47	NM_001323645	0.088235	137	72	7.49866	4.66791	6.13013	7.07885	5.32831	5.00664	5.935	6.71752	5.37395	1.22331	2.45982	0.0384031
CD4	chr10:3785158:3785536	chr10	3785158	3785536	+	promoter-TSS (NM_001300)	promoter-TSS (NM_001300)	-66	NM_001160124	0.100529	379	66	8.57931	7.65623	8.31125	8.87766	8.31125	7.76359	8.53465	8.31125	8.35577	0.527021	2.367	0.0444799
CD4	chr11:101914933:101915235	chr11	101914933	101915235	+	promoter-TSS (NM_020802)	promoter-TSS (NM_020802)	69	NM_020802	0.099338	303	69	8.51028	7.50162	8.76738	8.61622	8.23379	7.6051	8.52283	8.31125	8.41985	0.60805	2.43037	0.0402353
CD4	chr1:110963906:110964289	chr1	110963906	110964289	+	promoter-TSS (NM_001006945)	promoter-TSS (NM_001006945)	-153	NM_001006945	0.070496	384	59	8.7576	8.09104	8.86096	8.96845	8.46323	8.95183	8.89694	8.39027	8.41985	0.442779	2.35268	0.0454997
CD4	chr1:1116050:1116480	chr1	1116050	1116480	+	promoter-TSS (NM_017891)	promoter-TSS (NM_017891)	91	NM_001330306	0.137209	431	72	9.53302	8.55886	9.06978	9.01215	8.65726	8.83959	9.10878	8.35577	8.46323	0.596994	3.03147	0.015662
CD4	chr11:43680359:43680823	chr11	43680359	43680823	+	promoter-TSS (NM_016142)	promoter-TSS (NM_016142)	-2	NM_016142	0.079741	465	61	8.86723	8.96845	8.58882	8.70716	9.20184	9.42715	8.99421	9.39935	9.35323	-0.473987	-2.5239	0.0347023
CD4	chr11:47269723:47270189	chr11	47269723	47270189	+	promoter-TSS (NM_001135943)	promoter-TSS (NM_001135943)	-164	NM_001135943	0.118026	467	72	8.91219	7.80921	8.89993	8.67147	8.54565	8.35577	8.90621	8.44276	8.39027	0.552852	2.71308	0.0257493
CD4	chr11:507120:507574	chr11	507120	507574	+	promoter-TSS (NM_002939)	promoter-TSS (NM_002939)	-64	NM_203389	0.123348	455	74	8.44276	7.65141	8.51028	8.67147	8.31125	8.31125	8.4818	8.31125	7.84709	0.471525	2.40474	0.0419013
CD4	chr1:155562664:155563038	chr1	155562664	155563038	+	promoter-TSS (NM_018489)	promoter-TSS (NM_018489)	-318	NM_018489	0.101604	375	73	8.23379	6.00388	7.43677	8.39027	6.68967	7.45471	8.41985	8.23379	7.06326	1.06148	2.34667	0.0459347
CD4	chr1:15617315:15617686	chr1	15617315	15617686	+	promoter-TSS (NM_032341)	promoter-TSS (NM_032341)	42	NM_032341	0.142857	372	77	8.23379	7.1873	7.9673	8.55886	7.61476	7.83434	8.72247	7.95434	8.23379	0.644825	2.55962	0.0327976
CD4	chr11:58579379:58579680	chr11	58579379	58579680	+	exon (NM_053023, exon 1 of 11)	exon (NM_053023, exon 1 of 11)	415	NR_024091	0.112957	302	73	8.23379	6.4418	7.33097	8.23379	6.56744	6.70665	7.49632	6.87295	7.05023	1.10934	4.1391	0.00303328
CD4	chr11:642678:642828	chr11	642678	642828	+	Intergenic	Intergenic	5448	NM_000797	0.026667	151	66	8.31125	5.10047	6.69249	7.93775	5.6166	6.97216	8.60632	7.97552	6.06692	1.54406	2.36042	0.0449461
CD4	chr11:65122108:65122432	chr11	65122108	65122432	+	promoter-TSS (NM_004927)	promoter-TSS (NM_004927)	26	NM_004927	0.101852	325	65	8.74384	7.75454	8.88091	9.13839	8.46323	8.09691	8.53465	8.53465	8.35577	0.617731	2.86873	0.0201738
CD4	chr11:66257579:66257965	chr11	66257579	66257965	+	promoter-TSS (NM_022822)	promoter-TSS (NM_022822)	69	NM_001318734	0.126943	387	76	8.41985	7.52302	8.51028	8.41985	7.43255	8.23379	8.41985	8.31125	7.23529	0.687999	2.49965	0.0360584
CD4	chr11:67239727:67240063	chr11	67239727	67240063	+	promoter-TSS (NM_001256405)	promoter-TSS (NM_001256405)	-140	NM_001256405	0.035714	337	62	8.44276	7.3517	8.52283	9.19752	8.31125	8.39027	8.70716	8.31125	8.51028	0.618837	2.9274	0.0184094
CD4	chr11:74170891:74171248	chr11	74170891	74171248	+	promoter-TSS (NM_001286577)	promoter-TSS (NM_001286577)	6	NM_001271593	0.070028	358	60	8.74384	8.41985	8.7621	8.95737	8.4818	8.56922	8.79334	8.44276	8.46323	0.353597	2.33104	0.0470851
CD4	chr11:85628298:85628632	chr11	85628298	85628632	+	promoter-TSS (NM_001193537)	promoter-TSS (NM_001193537)	-108	NM_018480	0.07485	335	61	8.8743	8.62803	8.4818	9.04625	8.31125	7.89738	8.90621	8.31125	8.41985	0.505396	2.32459	0.0475685
CD4	chr1:205813073:205813421	chr1	205813073	205813421	+	promoter-TSS (NM_173854)	promoter-TSS (NM_173854)	-51	NM_173854	0.100575	349	71	8.49697	8.39027	8.4818	8.86723	8.31125	8.02546	9.2344	8.39027	8.06262	0.539902	2.4058	0.0418307
CD4	chr12:120317550:120317885	chr12	120317550	120317885	+	Intergenic	CpG	10072	NM_000928	0.071642	336	56	8.56922	7.95943	8.59707	9.51215	8.41985	8.03658	8.41985	8.31125	8.41985	0.600998	2.69246	0.0265987
CD4	chr12:121839520:121839796	chr12	121839520	121839796	+	3' UTR (NM_002150, exon 14 of 14)	3' UTR (NM_002150, exon 14 of 14)	19205	NM_002150	0.061594	277	68	8.89694	7.94846	8.52283	8.60632	8.31125	7.95285	8.87032	8.31125	8.35577	0.545077	2.81127	0.0220714
CD4	chr12:123972789:123973247	chr12	123972789	123973247	+	promoter-TSS (NM_001204299)	promoter-TSS (NM_001204299)	-33	NM_025140	0.152838	459	82	8.7621	7.8418	8.44276	8.94642	8.31125	8.57931	9.30633	8.31125	8.56922	0.580976	2.55009	0.0332952
CD4	chr1:23344215:23344541	chr1	23344215	23344541	+	promoter-TSS (NM_001102397)	promoter-TSS (NM_001102397)	-14	NM_001102397	0.107362	327	68	8.68409	8.02703	8.70179	9.31124	8.31125	8.08084	8.31125	8.31125	8.31125	0.578583	2.70035	0.0262705
CD4	chr1:243254864:243255220	chr1	243254864	243255220	+	promoter-TSS (NM_006642),2	promoter-TSS (NM_006642),2	364	NM_014812	0.154494	357	73	8.57931	7.34009	8.4818	8.55886	8.0393	7.44304	8.31125	8.23379	8.31125	0.622236	2.37158	0.0441589
CD4	chr12:49018715:49019013	chr12	49018715	49019013	+	promoter-TSS (NM_001206710)	promoter-TSS (NM_001206710)	-18	NM_001206709	0.097315	299	63	8.72247	7.60664	8.4818	8.94922	8.23379	7.84957	8.39027	8.31125	8.35577	0.592838	2.63918	0.0289272
CD4	chr13:49444009:49444402	chr13	49444009	49444402	+	promoter-TSS (NM_001320699)	promoter-TSS (NM_001320699)	-79	NM_001079670	0.086514	394	64	9.09394	9.63899	9.19752	8.86415	9.57514	9.2088	9.17454	10.0295	9.65799	-0.569736	-2.92246	0.0185515
CD4	chr14:103334025:103334410	chr14	103334025	103334410	+	promoter-TSS (NM_183004)	promoter-TSS (NM_183004)	215	NM_001969	0.114286	386	71	8.78039	8.07328	8.52283	9.20651	8.23379	8.05393	8.49697	8.31125	8.35577	0.570055	2.84824	0.0208304
CD4	chr1:45303561:45303879	chr1	45303561	45303879	+	promoter-TSS (NR_024270)	promoter-TSS (NR_024270)	-190	NR_024270	0.081761	319	70	8.57931	7.8741	8.8743	8.81746	8.31125	8.23379	8.41985	8.31125	8.09703	0.528698	2.87496	0.0199784
CD4	chr14:77097817:77098224	chr14	77097817	77098224	+	promoter-TSS (NM_033426)	promoter-TSS (NM_033426)	-215	NM_033426	0.113022	408	70	8.46323	8.31125	8.76738	9.34791	8.46323	8.65065	8.88398	8.44276	8.44276	0.453027	2.65969	0.0280072
CD4	chr15:20341974:20342308	chr15	20341974	20342308	+	Intergenic	(AGCCAGCCA)n|Simple_repeat|Simple_repeat	59397	NR_038836	0.005988	335	67	9.84939	9.13373	10.0295	9.36463	8.31125	9.56098	9.77947	9.12691	8.23379	0.834715	2.7607	0.0238931
CD4	chr1:52703144:52703449	chr1	52703144	52703449	+	Intergenic	Intergenic	-4930	NM_023077	0.04918	306	63	8.23379	7.36912	7.76542	8.23379	7.62423	7.05581	8.01749	7.99347	7.10537	0.622476	2.47625	0.0374177
CD4	chr15:72272535:72272893	chr15	72272535	72272893	+	promoter-TSS (NM_001323515)	promoter-TSS (NM_001323515)	-139	NR_136608	0.128492	359	74	8.62803	7.99057	8.72805	9.83973	8.97358	9.02682	9.05091	8.61622	8.68409	0.504036	2.82936	0.021455
CD4	chr1:5992357:5992677	chr1	5992357	5992677	+	promoter-TSS (NM_015102)	promoter-TSS (NM_015102)	-44	NM_001291593	0.1125	321	68	8.58882	7.93131	9.2469	9.18804	8.46323	8.57931	8.79334	8.46323	8.54565	0.60406	3.10418	0.013998
CD4	chr16:1025228:1025604	chr16	1025228	1025604	+	Intergenic	Intergenic	43608	NM_014587	0.039894	377	70	9.32142	7.57091	9.36994	8.81352	8.23379	8.58882	9.74253	8.31125	7.36948	1.29684	3.97888	0.00380711
CD4	chr16:19555383:19555727	chr16	19555383	19555727	+	exon (NM_001300743, exon 1 of 28)	exon (NM_001300743, exon 1 of 28)	140	NM_001300743	0.078488	345	64	8.44276	8.08181	8.67147	8.96284	8.31125	8.41985	8.51028	8.31125	8.09752	0.434038	2.57413	0.0320543
CD4	chr16:22374495:22374908	chr16	22374495	22374908	+	promoter-TSS (NM_001802)	promoter-TSS (NM_001802)	-84	NM_001802	0.113801	414	68	8.67828	6.85375	8.80597	8.97919	8.23379	8.54565	8.70716	8.31125	8.35577	0.80563	2.72175	0.0254006
CD4	chr16:30558309:30558653	chr16	30558309	30558653	+	promoter-TSS (NM_001172679)	promoter-TSS (NM_001172679)	-160	NM_001172679	0.104651	345	63	9.24922	7.95219	8.63673	8.92121	8.23379	8.56922	8.68959	8.31125	8.35577	0.596716	2.7829	0.0230751
CD4	chr16:33337726:33337876	chr16	33337726	33337876	+	Intergenic	(TGGCTTGGC)n|Simple_repeat|Simple_repeat	-23076	NR_110897	0	151	66	8.31125	5.91372	6.45745	8.23379	5.72145	6.87353	7.84501	7.33489	5.41089	1.45484	2.69124	0.0266495
CD4	chr17:1516625:1516977	chr17	1516625	1516977	+	promoter-TSS (NM_001135642)	promoter-TSS (NM_001135642)	87	NM_001135642	0.139205	353	73	8.94922	8.44276	9.50369	9.38469	8.79334	8.68409	9.23671	8.53465	8.74862	0.659849	3.88805	0.00433767
CD4	chr17:18314915:18315279	chr17	18314915	18315279	+	promoter-TSS (NM_001320759)	promoter-TSS (NM_001320759)	-5	NM_004618	0.090659	365	64	8.84699	8.39027	8.67828	8.89383	8.31125	8.66383	9.08171	8.46323	8.35577	0.444234	2.52552	0.034613
CD4	chr17:21214130:21214538	chr17	21214130	21214538	+	non-coding (NR_024547, exon 1 of 3)	non-coding (NR_024547, exon 1 of 3)	261	NM_003876	0.10049	409	68	8.67828	7.64023	8.61622	8.23379	8.23379	7.818	9.18353	8.31125	8.23379	0.624081	2.40928	0.041601
CD4	chr17:28951467:28951944	chr17	28951467	28951944	+	promoter-TSS (NM_001033561)	promoter-TSS (NM_001033561)	-215	NM_001290131	0.092243	478	65	9.12931	8.08606	8.90321	9.09394	8.69632	8.98945	9.24922	8.66383	8.71741	0.494838	2.40492	0.041889
CD4	chr17:44775585:44775963	chr17	44775585	44775963	+	intron (NM_001318933, intron 17 of 26)	CpG-11250	16595	NM_001318933	0.071429	379	67	9.02425	7.97659	8.89993	8.81746	8.31125	8.67147	8.90621	8.46323	8.41985	0.553345	2.8674	0.0202158
CD4	chr17:5486248:5486533	chr17	5486248	5486533	+	promoter-TSS (NM_001304777)	promoter-TSS (NM_001304777)	16	NM_001258219	0.077193	286	60	8.69632	7.80949	8.4818	8.92121	8.31125	8.57931	8.51028	8.31125	8.01936	0.480857	2.41932	0.040945
CD4	chr17:56833832:56834190	chr17	56833832	56834190	+	promoter-TSS (NM_001085430)	promoter-TSS (NM_001085430)	-88	NM_003647	0.100559	359	71	8.49697	8.0762	8.63673	8.9384	8.41985	8.35577	8.51028	8.31125	8.35577	0.374894	2.37996	0.0435767
CD4	chr17:59892896:59893262	chr17	59892896	59893262	+	promoter-TSS (NM_001193609)	promoter-TSS (NM_001193609)	33	NM_001272042	0.076503	367	61	8.55886	8.35577	8.4818	9.51982	8.39027	8.35577	8.63673	8.31125	8.35577	0.493377	2.35835	0.0450936
CD4	chr17:68247797:68248102	chr17	68247797	68248102	+	promoter-TSS (NM_001289056)	promoter-TSS (NM_001289056)	-55	NM_001346483	0.134426	306	73	8.49697	8.35577	8.79334	9.00457	8.31125	7.99998	8.51028	8.31125	8.35577	0.447699	2.36095	0.0449083
CD4	chr17:81238956:81239307	chr17	81238956	81239307	+	promoter-TSS (NM_144679)	promoter-TSS (NM_144679)	-40	NM_144679	0.079772	352	65	8.7621	8.65726	9.11102	9.4209	8.41985	8.41985	9.1315	8.81746	8.41985	0.57053	2.82034	0.02176
CD4	chr17:81911461:81911789	chr17	81911461	81911789	+	promoter-TSS (NM_001282203)	promoter-TSS (NM_001282203)	-148	NM_002861	0.134146	329	79	8.53465	7.88267	8.41985	9.01215	8.31125	8.35577	8.74862	8.31125	8.41985	0.465267	2.70087	0.0262488
CD4	chr17:82458413:82458780	chr17	82458413	82458780	+	promoter-TSS (NM_031968)	promoter-TSS (NM_031968)	-68	NM_001083608	0.114441	368	72	8.88091	8.0414	9.21114	9.60744	8.39027	8.23379	9.05091	8.39027	8.4818	0.922622	5.23666	0.000707385
CD4	chr17:8295367:8295474	chr17	8295367	8295474	+	promoter-TSS (NM_001320871)	promoter-TSS (NM_001320871)	-77	NM_001320871	0.084112	108	72	8.23379	5.95501	6.03514	7.36791	5.83522	5.60118	7.04264	7.01023	5.72387	1.08804	2.40205	0.04208
CD4	chr17:8630870:8631070	chr17	8630870	8631070	+	promoter-TSS (NM_005964)	promoter-TSS (NM_005964)	-209	NM_005964	0.075	201	66	8.23379	5.45649	6.68905	8.23379	7.15036	6.34053	7.43099	6.94875	7.34378	1.06699	2.34329	0.0461812
CD4	chr18:32018446:32018875	chr18	32018446	32018875	+	5' UTR (NM_017831, exon 1 of 6)	5' UTR (NM_017831, exon 1 of 6)	178	NM_017831	0.074592	430	63	8.74384	7.93575	8.58882	8.74862	8.31125	8.68959	9.39348	8.31125	8.35577	0.573912	2.46523	0.0380761
CD4	chr19:1082494:1082644	chr19	1082494	1082644	+	intron (NM_001282334, intron 9 of 12)	CpG-12984	5935	NM_001282334	0.06	151	67	8.23379	6.09613	5.61772	7.72731	5.98755	5.25387	7.11155	5.94738	5.72376	1.34811	2.66255	0.0278812
CD4	chr19:11346249:11346531	chr19	11346249	11346531	+	promoter-TSS (NM_001321114)	promoter-TSS (NM_001321114)	-85	NM_001321114	0.078014	283	60	8.80597	8.35577	8.44276	8.67147	8.23379	8.23379	8.99669	8.31125	8.35577	0.423464	2.37535	0.0438958
CD4	chr19:1490755:1491085	chr19	1490755	1491085	+	promoter-TSS (NM_017573)	promoter-TSS (NM_017573)	-85	NM_138393	0.10303	331	70	8.4818	7.97714	8.96557	8.63673	8.31125	8.49697	8.88398	8.39027	8.35577	0.455002	2.38857	0.0429871
CD4	chr19:15379715:15380111	chr19	15379715	15380111	+	promoter-TSS (NM_005858)	promoter-TSS (NM_005858)	-112	NM_005858	0.111111	397	68	8.68959	7.88097	8.87766	9.07461	8.54565	8.31125	8.51028	8.53465	8.35577	0.497729	2.53386	0.0341598
CD4	chr19:16324448:16325039	chr19	16324448	16325039	+	promoter-TSS (NM_016270)	promoter-TSS (NM_016270)	-83	NM_016270	0.150592	592	78	8.67147	7.77202	8.85735	9.2469	8.39027	8.70716	9.32393	8.94922	8.52283	0.603849	2.37803	0.0437106
CD4	chr19:16628053:16628452	chr19	16628053	16628452	+	promoter-TSS (NM_004831)	promoter-TSS (NM_004831)	-48	NM_004831	0.150376	400	79	8.74384	8.67828	8.91506	9.12931	8.31125	8.60632	8.94642	8.54565	8.46323	0.418176	2.38557	0.0431918
Cell-Type	ATAC_ID	Chr	Start	End	Strand	Annotation	Detailed Annotation	Distance to.TSS	Nearest PromoterID	CpG	widths	GC Percentage	1_ATAC	2_ATAC	3_ATAC	5_ATAC	7_ATAC	8_ATAC	9_ATAC	10_ATAC	11_ATAC	logFC	t.stat	p.value
CD4	chr19:18919439:18919805	chr19	18919439	18919805	+	promoter-TSS (NR_033677)	promoter-TSS (NR_033677)	-53	NM_019070	0.084699	367	60	8.23379	7.85707	8.76738	9.31394	8.31125	7.89576	8.23379	8.31125	8.35577	0.546109	2.29448	0.0498895
CD4	chr19:2151524:2151893	chr19	2151524	2151893	+	promoter-TSS (NM_001261826)	promoter-TSS (NM_001261826)	-151	NM_001261826	0.086721	370	68	8.88091	8.39027	9.2344	8.84699	8.55886	8.57931	8.92121	8.55886	8.35577	0.48246	2.77695	0.0232914
CD4	chr19:29715041:29715332	chr19	29715041	29715332	+	promoter-TSS (NM_001031726)	promoter-TSS (NM_001031726)	-130	NM_001282929	0.127148	292	80	8.31125	5.54603	7.38945	8.23379	6.78823	6.50809	8.23379	7.86012	6.55149	1.41472	3.15687	0.0129079
CD4	chr19:40425773:40426232	chr19	40425773	40426232	+	promoter-TSS (NM_013376)	promoter-TSS (NM_013376)	23	NM_013376	0.074074	460	63	9.65799	8.4818	9.26138	9.39935	8.9818	8.94922	9.16586	8.71741	8.8098	0.596312	3.0734	0.0146787
CD4	chr19:40465716:40466203	chr19	40465716	40466203	+	promoter-TSS (NM_000713)	promoter-TSS (NM_000713)	-141	NM_000713	0.078029	488	67	9.59095	8.61622	8.83619	8.9269	8.91506	8.739	9.25684	8.31125	8.35577	0.555306	2.35402	0.0454034
CD4	chr19:40570462:40570931	chr19	40570462	40570931	+	exon (NM_020971, exon 33 of 36)	exon (NM_020971, exon 33 of 36)	-6155	NM_138392	0.098081	470	71	9.19033	8.04882	8.79334	8.82153	8.39027	8.81746	8.99933	8.31125	8.35577	0.576054	2.73943	0.0247048
CD4	chr19:42283564:42284024	chr19	42283564	42284024	+	promoter-TSS (NM_015125)	promoter-TSS (NM_015125)	-871	NM_015125	0.126087	461	76	8.72247	8.39027	9.04862	9.00457	8.31125	8.60632	9.4149	8.31125	8.44276	0.651146	3.3786	0.00920782
CD4	chr19:4342676:4343043	chr19	4342676	4343043	+	promoter-TSS (NM_001159846)	promoter-TSS (NM_001159846)	-668	NM_001159846	0.049046	368	55	8.7576	8.35577	8.739	8.8098	8.41985	8.52283	8.90912	8.31125	8.35577	0.419937	2.69874	0.0263369
CD4	chr19:48321856:48322235	chr19	48321856	48322235	+	Intergenic	CpG	-1970	NM_144577	0.094987	380	69	8.91836	8.62803	9.06978	9.26847	8.91219	8.99421	9.26847	8.66383	8.35577	0.448546	2.38946	0.0429263
CD4	chr19:49500769:49501271	chr19	49500769	49501271	+	promoter-TSS (NR_029703)	promoter-TSS (NR_029703)	-152	NR_029703	0.039841	503	67	8.739	8.70716	8.82153	9.05808	8.39027	8.41985	9.01467	8.53465	8.41985	0.414291	2.38894	0.0429623
CD4	chr19:6767390:6767757	chr19	6767390	6767757	+	promoter-TSS (NM_005490)	promoter-TSS (NM_005490)	-61	NM_005490	0.057221	368	65	8.23379	7.49229	8.31125	8.79334	8.05432	8.23379	8.77161	8.31125	7.91019	0.57276	2.72883	0.0251197
CD4	chr19:680391:680703	chr19	680391	680703	+	intron (NM_005860, intron 3 of 4)	CpG-12911	4158	NM_005860	0.128205	313	76	8.49697	8.01315	8.61622	8.97919	8.41985	8.35577	8.41985	8.31125	7.85586	0.469468	2.42444	0.0406145
CD4	chr19:796929:797283	chr19	796929	797283	+	promoter-TSS (NM_002819)	promoter-TSS (NM_002819)	-286	NM_031991	0.079096	355	63	9.27811	8.65726	9.13839	9.21114	8.70179	8.57931	9.07461	8.89078	8.62803	0.476531	2.93116	0.0183018
CD4	chr19:8444775:8445050	chr19	8444775	8445050	+	promoter-TSS (NM_001297418)	promoter-TSS (NM_001297418)	-7	NM_005968	0.138182	276	70	8.41985	7.43787	8.75331	8.56922	8.31125	7.86149	8.61622	8.31125	8.35577	0.563447	2.41876	0.0409811
CD4	chr20:20337364:20337510	chr20	20337364	20337510	+	intron (NM_015585, intron 25 of 26)	(GGAT)n|Simple_repeat|Simple_repeat	-30684	NM_002196	0	147	50	8.23379	4.34347	5.9511	8.03371	5.74771	5.82047	5.77776	6.28205	2.73362	2.03715	2.31914	0.0479803
CD4	chr21:37267388:37267841	chr21	37267388	37267841	+	promoter-TSS (NM_006052)	promoter-TSS (NM_006052)	-82	NM_006052	0.083885	454	65	8.92121	8.59707	9.26607	9.37586	8.72805	8.78039	9.37297	8.90912	8.92121	0.470232	2.7229	0.0253551
CD4	chr21:42496230:42496554	chr21	42496230	42496554	+	promoter-TSS (NR_135518)	promoter-TSS (NR_135518)	-38	NM_080860	0.108025	325	70	9.2088	8.09079	8.54565	8.71741	8.31125	7.60714	8.53465	8.39027	8.08773	0.626115	2.70872	0.0259267
CD4	chr21:43262480:43262794	chr21	43262480	43262794	+	Intergenic	Intergenic	69402	NR_103713	0.003185	315	59	8.55886	7.26295	8.67147	9.00187	8.31125	8.23379	8.53465	8.53465	7.58932	0.752724	2.72759	0.0251686
CD4	chr21:44339120:44339617	chr21	44339120	44339617	+	promoter-TSS (NM_001271440)	promoter-TSS (NM_001271440)	34	NM_004928	0.120724	498	72	8.82153	7.94033	8.31125	8.89078	8.31125	8.49697	8.96557	8.31125	8.35577	0.491294	2.43547	0.0399121
CD4	chr21:46228795:46229124	chr21	46228795	46229124	+	promoter-TSS (NR_110565)	promoter-TSS (NR_110565)	-135	NM_001145437	0.103343	330	77	8.49697	7.739	8.67147	8.44276	8.31125	7.92172	8.58882	8.31125	8.10558	0.480379	2.4859	0.036851
CD4	chr2:162343895:162344191	chr2	162343895	162344191	+	promoter-TSS (NM_012198)	promoter-TSS (NM_012198)	-30	NM_012198	0.060811	297	64	8.66383	9.06498	8.69632	8.58882	9.35898	9.02925	8.83959	9.65799	9.68292	-0.663532	-3.10239	0.0140366
CD4	chr2:190880600:190880953	chr2	190880600	190880953	+	promoter-TSS (NM_014905)	promoter-TSS (NM_014905)	-45	NM_014905	0.090652	354	66	8.49697	8.04395	8.8098	9.02682	8.51028	8.49697	8.72247	8.31125	8.67828	0.401814	2.44947	0.0390375
CD4	chr2:195657080:195657420	chr2	195657080	195657420	+	5' UTR (NM_020342, exon 1 of 10)	5' UTR (NM_020342, exon 1 of 10)	122	NM_020342	0.097059	341	62	8.86096	7.25391	8.81746	8.86723	8.31125	7.94259	8.23379	8.31125	8.35577	0.693392	2.48598	0.0368467
CD4	chr22:30423904:30424292	chr22	30423904	30424292	+	3' UTR (NM_001204204, exon 10 of 10)	3' UTR (NM_001204204, exon 10 of 10)	-1525	NM_001003704	0.074742	389	62	8.72247	8.41985	9.01215	9.34791	8.71229	8.59707	8.95466	8.67828	8.89078	0.388132	2.29935	0.0495065
CD4	chr22:31345668:31345821	chr22	31345668	31345821	+	5' UTR (NM_014323, exon 1 of 5)	5' UTR (NM_014323, exon 1 of 5)	519	NM_014323	0.091503	154	69	7.95883	4.6178	5.99793	7.6082	6.0428	4.94841	7.44826	6.965	6.50802	1.45636	2.4056	0.041844
CD4	chr22:37844290:37844650	chr22	37844290	37844650	+	promoter-TSS (NM_138797)	promoter-TSS (NM_138797)	-99	NR_030395	0.083333	361	58	8.56922	7.34548	8.63673	8.85735	8.31125	8.23379	8.51028	8.31125	8.35577	0.581169	2.64239	0.0287811
CD4	chr2:238288760:238289123	chr2	238288760	238289123	+	promoter-TSS (NM_022817)	promoter-TSS (NM_022817)	-375	NM_022817	0.146006	364	68	8.31125	8.41985	9.10077	9.08171	8.31125	8.52283	8.93292	8.31125	8.35577	0.503022	2.52152	0.0348329
CD4	chr2:239400744:239401860	chr2	239400744	239401860	+	promoter-TSS (NR_135575)	promoter-TSS (NR_135575)	-134	NR_135575	0.124552	1117	74	9.00705	9.43027	9.12451	9.16378	9.46727	9.54615	8.95183	9.29326	9.72759	-0.415796	-2.4907	0.0365727
CD4	chr22:40951031:40951757	chr22	40951031	40951757	+	promoter-TSS (NM_014248)	promoter-TSS (NM_014248)	47	NM_014248	0.104683	727	68	9.28298	8.58882	8.96845	9.1315	8.71741	8.98945	9.10337	8.57931	8.49697	0.454076	2.49846	0.0361261
CD4	chr2:241150260:241150594	chr2	241150260	241150594	+	promoter-TSS (NM_001252124)	promoter-TSS (NM_001252124)	-448	NM_001252120	0.110778	335	71	8.82153	8.51028	8.71741	8.94119	8.31125	8.35577	8.78848	8.31125	8.41985	0.436229	2.73579	0.0248464
CD4	chr22:41832773:41833141	chr22	41832773	41833141	+	promoter-TSS (NR_103834)	promoter-TSS (NR_103834)	-122	NR_103834	0.092391	369	66	8.85399	7.54728	8.8435	8.82524	8.06046	8.03924	8.51028	8.31125	7.99925	0.778767	3.76446	0.00518992
CD4	chr3:49094171:49094602	chr3	49094171	49094602	+	promoter-TSS (NM_001320580)	promoter-TSS (NM_001320580)	-13	NM_017730	0.062645	432	65	8.41985	7.7216	8.03609	8.67147	7.89631	7.35557	8.41985	8.31125	7.2553	0.675	2.48163	0.037101
CD4	chr3:63911969:63912077	chr3	63911969	63912077	+	intron (NM_000333, intron 2 of 12)	CpG	13624	NM_001177387	0.101852	109	69	6.95889	3.99972	5.0619	7.90521	5.10042	4.94809	6.68947	6.15579	5.77642	1.54445	2.61549	0.0300286
CD4	chr3:98901654:98902001	chr3	98901654	98902001	+	promoter-TSS (NM_080927)	promoter-TSS (NM_080927)	-138	NM_080927	0.10951	348	72	8.23379	8.77161	8.03678	8.46323	8.86723	8.82891	8.68959	9.06498	8.70716	-0.481303	-2.44327	0.0394222
CD4	chr4:102827358:102828202	chr4	102827358	102828202	+	promoter-TSS (NM_181892)	promoter-TSS (NM_181892)	168	NM_003340	0.081754	845	63	8.89993	9.24922	8.68959	8.78039	9.16171	8.97358	8.49697	9.16171	9.40856	-0.483588	-2.70217	0.0261952
CD4	chr4:190122868:190123018	chr4	190122868	190123018	+	Intergenic	(AGGGTT)n|Simple_repeat|Simple_repeat	-50831	NM_001293798	0	151	50	8.23379	4.31456	5.63822	8.23379	5.40556	4.28138	6.79716	6.86237	4.96808	2.06617	2.83349	0.0213166
CD4	chr4:3073983:3074767	chr4	3073983	3074767	+	promoter-TSS (NM_002111)	promoter-TSS (NM_002111)	139	NR_045414	0.103316	785	75	9.46727	8.85399	9.18804	9.43027	8.86415	9.19752	9.33693	9.01943	8.83959	0.405348	2.33865	0.0465214
CD4	chr5:173057027:173057417	chr5	173057027	173057417	+	intron (NM_001168393, intron 1 of 3)	CpG	870	NM_001168394	0.071795	391	68	8.80597	8.39027	9.30877	9.09832	8.83619	8.35577	9.00187	8.31125	8.46323	0.606065	3.23087	0.0115247
CD4	chr5:176361669:176361997	chr5	176361669	176361997	+	promoter-TSS (NM_001079684)	promoter-TSS (NM_001079684)	-26	NR_109797	0.088415	329	65	8.44276	7.53845	8.78848	8.54565	8.23379	7.74861	8.44276	8.31125	8.35577	0.535487	2.29335	0.0499788
CD4	chr5:49600452:49600738	chr5	49600452	49600738	+	Intergenic	BSR/Beta|Satellite|Satellite	840805	NM_198449	0.01049	287	47	9.51215	8.41985	9.17004	9.15548	8.49697	9.20651	9.68292	9.00705	8.31125	0.684394	2.63279	0.0292201
CD4	chr6:12011234:12011746	chr6	12011234	12011746	+	Intergenic	CpG	-1001	NM_002114	0.117188	513	77	8.85399	7.64705	9.13373	8.83619	8.41985	8.41985	9.17676	8.62803	8.35577	0.728528	3.10249	0.0140345
CD4	chr6:158869668:158870076	chr6	158869668	158870076	+	promoter-TSS (NM_001302839)	promoter-TSS (NM_001302839)	5	NM_001302840	0.112745	409	66	8.49697	7.61087	8.74862	9.31124	8.75331	8.23379	8.61622	8.31125	8.39027	0.608522	3.12116	0.0136366
CD4	chr7:158829263:158829763	chr7	158829263	158829763	+	exon (NM_020728, exon 1 of 22)	exon (NM_020728, exon 1 of 22)	115	NM_020728	0.156	501	79	9.28057	7.83547	8.99669	9.09164	8.80597	8.46323	9.39935	8.53465	9.03176	0.690249	2.7119	0.0257972
CD4	chr7:5397108:5397496	chr7	5397108	5397496	+	intron (NM_001080495, intron 2 of 29)	intron (NM_001080495, intron 2 of 29)	26244	NM_001080495	0.056701	389	71	8.49697	7.44036	8.51028	8.60632	8.05086	7.87498	8.53465	8.31125	8.35577	0.553318	2.48964	0.0366336
CD4	chr7:73738787:73739137	chr7	73738787	73739137	+	promoter-TSS (NM_001145364)	promoter-TSS (NM_001145364)	-95	NM_001321383	0.117143	351	69	8.70716	8.41985	8.44276	8.87766	8.31125	8.06618	8.99669	8.31125	7.92589	0.547057	2.69784	0.0263744
CD4	chr7:87876259:87876584	chr7	87876259	87876584	+	promoter-TSS (NM_018843)	promoter-TSS (NM_018843)	-44	NM_018843	0.150769	326	72	8.31125	8.60632	7.86773	8.23379	8.46323	8.56922	8.49697	8.95183	9.05346	-0.508007	-2.31059	0.0486343
CD4	chr9:92764731:92765160	chr9	92764731	92765160	+	promoter-TSS (NM_001003800)	promoter-TSS (NM_001003800)	-144	NM_015250	0.132867	430	77	9.10878	9.10617	9.17901	9.07703	8.41985	8.46323	9.31893	8.44276	8.67828	0.523301	2.69112	0.0266548
CD8	chr10:132331775:132332275	chr10	132331775	132332275	+	promoter-TSS (NM_001318881)	promoter-TSS (NM_001318881)	-85	NM_001143759	0.124	501	74	7.92298	7.71434	7.80705	7.84314	7.34633	7.40018	7.89446	7.4385	7.57747	0.355983	2.42142	0.045538
CD8	chr10:50624420:50624794	chr10	50624420	50624794	+	promoter-TSS (NR_126411)	promoter-TSS (NR_126411)	-344	NR_126411	0.096257	375	65	7.61032	6.74175	7.48709	7.4484	7.32308	7.09384	7.85518	6.74175	7.19172	0.604216	3.1138	0.0167007
CD8	chr10:72354707:72355113	chr10	72354707	72355113	+	exon (NM_001002762, exon 1 of 8)	exon (NM_001002762, exon 1 of 8)	239	NM_001002762	0.091133	407	64	7.19172	6.74175	6.74175	6.93176	6.46651	5.61798	6.93176	5.79511	6.13908	0.770533	2.84988	0.0243415
CD8	chr11:102347038:102347396	chr11	102347038	102347396	+	promoter-TSS (NM_001256166)	promoter-TSS (NM_001256166)	35	NM_001166	0.142458	359	72	7.34633	7.32308	7.55868	7.55868	7.09384	6.43761	7.4275	6.74175	6.93176	0.558128	2.53951	0.0382627
CD8	chr11:27506560:27506913	chr11	27506560	27506913	+	promoter-TSS (NR_002832)	promoter-TSS (NR_002832)	43	NM_018362	0.070822	354	66	7.79388	6.74175	7.85797	7.41578	7.34633	7.38532	8.09415	7.49622	6.93176	0.609726	2.48712	0.0413301
CD8	chr11:47642405:47642776	chr11	47642405	47642776	+	promoter-TSS (NM_001317231)	promoter-TSS (NM_001317231)	64	NM_001317233	0.123989	372	72	7.60596	6.93176	7.47826	7.19172	6.93176	7.09384	7.24974	6.74175	6.93176	0.4436	2.66987	0.0316099
CD8	chr11:67469167:67469487	chr11	67469167	67469487	+	promoter-TSS (NM_001078650)	promoter-TSS (NM_001078650)	-50	NM_001078650	0.125	321	77	7.5535	7.57323	7.83345	7.54859	7.09384	6.93176	7.73973	6.93176	7.34633	0.474554	2.42391	0.0453706
CD8	chr12:120495898:120496229	chr12	120495898	120496229	+	promoter-TSS (NM_003746)	promoter-TSS (NM_003746)	7	NM_001037495	0.087613	332	66	7.5861	7.49622	7.54859	7.74582	7.09384	7.09384	7.96131	7.09384	7.34633	0.480948	2.64082	0.0329805
CD8	chr12:53441437:53441765	chr12	53441437	53441765	+	promoter-TSS (NM_018457)	promoter-TSS (NM_018457)	-48	NM_018457	0.057927	329	58	7.69946	7.4275	7.88184	8.34446	7.52378	7.60222	8.02398	7.63037	7.81202	0.423478	2.62957	0.0335277
CD8	chr1:40257845:40258272	chr1	40257845	40258272	+	promoter-TSS (NM_005857)	promoter-TSS (NM_005857)	8	NM_005857	0.070258	428	63	7.86321	7.60222	7.80854	7.46725	6.93176	7.32308	7.84039	6.74175	7.32308	0.532085	2.44304	0.044107
CD8	chr14:55051546:55051894	chr14	55051546	55051894	+	promoter-TSS (NM_144578)	promoter-TSS (NM_144578)	76	NM_144578	0.12069	349	73	7.57747	6.93176	7.34633	6.74175	6.93176	5.98476	7.66246	6.74175	6.74175	0.610856	2.42348	0.0453995
CD8	chr15:63277185:63277490	chr15	63277185	63277490	+	promoter-TSS (NM_001145646)	promoter-TSS (NM_001145646)	-213	NM_001145646	0.134426	306	80	6.74175	5.51752	6.33878	6.00837	5.85077	5.53089	6.74175	4.95352	5.9286	0.896007	3.17476	0.0153272
Cell-Type	ATAC_ID	Chr	Start	End	Strand	Annotation	Detailed Annotation	Distance to.TSS	Nearest PromoterID	CpG	widths	GC Percentage	1_ATAC	2_ATAC	3_ATAC	5_ATAC	7_ATAC	8_ATAC	9_ATAC	10_ATAC	11_ATAC	logFC	t.stat	p.value
CD8	chr1:59296640:59297140	chr1	59296640	59297140	+	promoter-TSS (NM_001113411)	promoter-TSS (NM_001113411)	-63	NM_001113411	0.102	501	67	7.40018	7.5033	6.74175	6.93176	7.40018	7.36702	6.74175	7.46725	7.4385	-0.504133	-2.8064	0.0259196
CD8	chr17:28318895:28319202	chr17	28318895	28319202	+	promoter-TSS (NM_014573)	promoter-TSS (NM_014573)	-47	NM_014573	0.117264	308	67	7.28874	8.05976	7.68811	7.09384	7.7683	7.40018	7.4385	7.86457	7.89321	-0.452365	-2.39414	0.047412
CD8	chr18:21740458:21740933	chr18	21740458	21740933	+	promoter-TSS (NM_020774)	promoter-TSS (NM_020774)	-634	NM_020774	0.065263	476	58	7.63972	7.32308	7.75349	7.95369	7.46725	7.4275	7.79053	7.52943	7.34633	0.381938	2.68286	0.0310164
CD8	chr19:17469863:17470232	chr19	17469863	17470232	+	promoter-TSS (NM_198580)	promoter-TSS (NM_198580)	-397	NM_198580	0.03523	370	60	7.51074	6.74175	7.40018	6.93176	7.19172	6.74175	7.60596	6.74175	6.74175	0.517307	2.47469	0.0420945
CD8	chr19:39435928:39436290	chr19	39435928	39436290	+	promoter-TSS (NM_001321111)	promoter-TSS (NM_001321111)	-89	NM_001020	0.09116	363	64	7.45813	7.67505	8.09697	7.76076	7.24974	6.93176	7.93083	6.74175	6.93176	0.698661	2.71696	0.0295128
CD8	chr19:47112996:47113496	chr19	47112996	47113496	+	intron (NM_015168, intron 1 of 14)	intron (NM_015168, intron 1 of 14)	506	NM_015168	0.076	501	64	8.04116	7.76492	8.2034	8.31847	7.91595	8.09508	8.39147	7.86583	7.93927	0.345466	2.38529	0.0480366
CD8	chr19:48493319:48493687	chr19	48493319	48493687	+	intron (NM_001080434, intron 13 of 15)	CpG	19686	NM_001080434	0.065217	369	74	7.40018	7.4484	7.4484	7.41578	6.93176	5.9573	7.69946	6.74175	5.95377	0.838859	2.51887	0.0394425
CD8	chr19:50476238:50476547	chr19	50476238	50476547	+	promoter-TSS (NM_175063)	promoter-TSS (NM_175063)	-85	NM_175063	0.093851	310	68	6.74175	6.74175	6.74175	6.93176	6.11201	5.53176	7.28874	6.42049	6.1883	0.694794	2.58475	0.0358036
CD8	chr20:5119892:5120204	chr20	5119892	5120204	+	promoter-TSS (NM_182649)	promoter-TSS (NM_182649)	-47	NM_182649	0.121795	313	66	7.48709	7.91595	7.24974	7.24974	7.52943	7.40018	6.74175	7.64883	7.78578	-0.501985	-2.50358	0.04034
CD8	chr2:222860826:222861112	chr2	222860826	222861112	+	promoter-TSS (NM_004457)	promoter-TSS (NM_004457)	-45	NM_203372	0.136364	287	74	6.74175	7.57323	6.15337	6.74175	6.93176	7.32308	6.93176	7.41578	8.07548	-0.831296	-2.87995	0.0233096
CD8	chr4:81471885:81472209	chr4	81471885	81472209	+	promoter-TSS (NM_001300735)	promoter-TSS (NM_001300735)	-119	NM_001300736	0.111111	325	73	7.96337	8.25871	7.4275	7.32308	7.96784	7.94364	7.94589	8.07242	8.03905	-0.429708	-2.47097	0.0423263
CD8	chr6:88963569:88963879	chr6	88963569	88963879	+	promoter-TSS (NM_003800)	promoter-TSS (NM_003800)	-95	NM_001286426	0.093548	311	62	7.28874	6.74175	7.24974	7.32308	6.93176	6.74175	7.81674	7.09384	7.19172	0.485055	2.37684	0.0486406
CD8	chr7:1160132:1160487	chr7	1160132	1160487	+	promoter-TSS (NR_110070)	promoter-TSS (NR_110070)	-65	NR_110069	0.132394	356	74	7.78415	7.61376	7.82864	7.77037	7.09384	7.54859	7.92853	7.24974	7.38532	0.437827	2.572	0.0364798
CD8	chr7:138752459:138752895	chr7	138752459	138752895	+	exon (NM_130841, exon 10 of 21)	exon (NM_130841, exon 10 of 21)	21360	NM_130841	0.027523	437	54	7.49622	7.90331	7.47826	8.09697	8.25512	8.02398	7.6239	8.20248	8.32925	-0.429728	-2.58247	0.0359235
CD8	chr7:2314447:2314807	chr7	2314447	2314807	+	promoter-TSS (NM_013321)	promoter-TSS (NM_013321)	-152	NM_013321	0.111111	361	73	7.52943	6.93176	7.68498	6.93176	6.48591	7.09384	7.34633	6.74175	6.74175	0.536967	2.72005	0.0293803
CD8	chr8:11456523:11456968	chr8	11456523	11456968	+	intron (NM_053279, intron 1 of 2)	intron (NM_053279, intron 1 of 2)	10022	NM_053279	0.017978	446	60	7.63354	7.4385	7.83629	8.09793	6.93176	6.74175	8.30298	6.74175	7.34633	0.932929	3.73406	0.00714282
CD8	chr8:19817093:19817403	chr8	19817093	19817403	+	promoter-TSS (NM_018142)	promoter-TSS (NM_018142)	-159	NM_018142	0.077419	311	64	6.74175	6.93176	6.38057	7.4275	7.52943	7.52943	6.74175	7.55868	7.38532	-0.507141	-2.44107	0.0442352
CD8	chr8:57205774:57206060	chr8	57205774	57206060	+	Intergenic	MER50|LTR|ERV1	-12359	NR_038235	0.062937	287	57	6.74175	7.49622	7.6776	5.82703	5.26997	4.16212	7.51074	5.46202	4.71049	1.34931	2.42689	0.0451714
CD14	chr10:104121808:104122055	chr10	104121808	104122055	+	promoter-TSS (NM_145247)	promoter-TSS (NM_145247)	-127	NM_145247	0.137652	248	71	9.13435	10.3143	9.73003	8.38557	9.33308	9.73003	8.07205	12.6554	12.72	-2.22701	-2.45862	0.0326498
CD14	chr10:132364349:132364549	chr10	132364349	132364549	+	intron (NM_001309474, intron 8 of 9)	(CACTCA)n|Simple_repeat|Simple_repeat	27342	NM_001309474	0.03	201	55	8.05095	10.1148	9.73003	10.1148	10.3143	9.73003	7.04658	13.0977	11.3232	-2.15227	-2.21651	0.049706
CD14	chr11:117986173:117986396	chr11	117986173	117986396	+	promoter-TSS (NM_001558)	promoter-TSS (NM_001558)	-107	NR_026691	0.098655	224	74	8.71998	10.3143	9.73003	9.30311	10.3143	9.73003	8.32416	12.8875	12.7391	-2.20135	-2.46929	0.0320473
CD14	chr1:35193204:35193420	chr1	35193204	35193420	+	promoter-TSS (NR_136702)	promoter-TSS (NR_136702)	-167	NR_136702	0.032407	217	50	7.78666	8.54491	8.50926	6.52009	7.38836	9.73003	5.25529	9.01469	11.3232	-2.24386	-2.27259	0.0451176
CD14	chr16:87388407:87388601	chr16	87388407	87388601	+	intron (NM_001282683, intron 2 of 9)	intron (NM_001282683, intron 2 of 9)	3603	NM_001282683	0.046392	195	55	8.40848	9.22572	8.86744	6.1717	8.25157	9.73003	7.71951	9.73003	12.7007	-2.23987	-2.29192	0.0436331
CD14	chr19:41859512:41859720	chr19	41859512	41859720	+	promoter-TSS (NM_001022)	promoter-TSS (NM_001022)	-302	NM_001022	0.057692	209	58	7.42197	10.1148	9.19084	8.69143	8.22455	9.73003	7.04698	10.4182	12.6143	-2.13408	-2.21443	0.0498851
CD14	chr19:44845880:44846084	chr19	44845880	44846084	+	promoter-TSS (NM_002856)	promoter-TSS (NM_002856)	-154	NM_001042724	0.088235	205	71	7.50278	9.73003	9.73003	7.50163	8.8724	9.73003	8.08541	11.5619	12.6311	-2.35327	-2.48143	0.0313745
CD14	chr20:47894689:47894885	chr20	47894689	47894885	+	Intergenic	D20S16|Satellite|Satellite	-88439	NR_109942	0.030612	197	57	7.69566	11.1562	8.47698	8.42451	8.1072	9.73003	8.53496	10.4182	11.1036	-1.8941	-2.40324	0.0359603
CD14	chr3:49470043:49470268	chr3	49470043	49470268	+	promoter-TSS (NM_001177644)	promoter-TSS (NM_001177644)	23	NM_001177639	0.151111	226	77	8.69891	10.1148	9.73003	9.38545	10.3143	9.73003	8.0071	11.5619	12.7577	-1.92505	-2.29445	0.0434422
CD14	chr7:65980840:65981036	chr7	65980840	65981036	+	intron (NM_001293104, intron 1 of 10)	intron (NM_001293104, intron 1 of 10)	1376	NM_001293105	0.015306	197	54	7.68781	9.2475	9.06486	6.90409	7.94492	9.73003	7.47938	10.4182	12.8098	-2.31212	-2.30814	0.0424231
CD14	chr9:41229657:41229847	chr9	41229657	41229847	+	Intergenic	(TG)n|Simple_repeat|Simple_repeat	-4003	NR_039688	0.010526	191	55	7.54806	9.73003	9.24462	7.51226	8.23672	9.17042	7.67024	11.2272	12.6523	-2.2831	-2.34544	0.0397642
CD14	chr9:75088253:75088501	chr9	75088253	75088501	+	promoter-TSS (NM_012383)	promoter-TSS (NM_012383)	-53	NM_001330679	0.173387	249	78	9.05762	11.1562	9.73003	10.6363	10.4182	9.73003	7.9322	13.4391	12.6789	-2.16226	-2.22748	0.0487745
CD14	chrX:47217792:47218054	chrX	47217792	47218054	+	promoter-TSS (NM_033018)	promoter-TSS (NM_033018)	-206	NM_033018	0.076336	263	59	8.604	10.5938	9.73003	8.97101	9.73003	9.73003	8.32236	11.059	12.6263	-1.86726	-2.31246	0.0421068
CD19	chr10:100373324:100373474	chr10	100373324	100373474	+	promoter-TSS (NR_026762)	promoter-TSS (NR_026762)	-177	NR_026762	0.053333	151	63	6.50352	NA	6.12286	4.61532	5.43144	5.71987	5.77152	8.43091	8.66929	-1.86931	-2.75344	0.0308971
CD19	chr10:133689364:133689511	chr10	133689364	133689511	+	Intergenic	BSR/Beta|Satellite|Satellite	-62642	NM_001080998	0	148	49	8.02724	NA	7.68857	8.17907	8.02078	7.68857	8.53506	6.56699	6.56699	1.062	2.73199	0.0318235
CD19	chr10:14954205:14954355	chr10	14954205	14954355	+	non-coding (NR_110297, exon 1 of 17)	non-coding (NR_110297, exon 1 of 17)	152	NM_001033858	0.066667	151	60	6.50352	NA	5.03202	4.63472	4.77508	4.97504	4.48176	8.76754	8.65473	-2.26121	-2.41358	0.0496166
CD19	chr10:32958137:32958351	chr10	32958137	32958351	+	promoter-TSS (NM_133376)	promoter-TSS (NM_133376)	121	NM_002211	0.140187	215	81	6.50352	NA	5.91722	4.68102	5.73178	5.94973	6.00511	7.34095	7.00627	-1.14024	-4.4844	0.00352436
CD19	chr10:44959503:44959787	chr10	44959503	44959787	+	promoter-TSS (NR_033842)	promoter-TSS (NR_033842)	44	NR_033842	0.109155	285	76	7.60492	NA	7.32511	6.69936	7.28574	7.34232	7.1462	7.90309	7.76206	-0.568845	-4.08582	0.00558408
CD19	chr10:5852495:5852683	chr10	5852495	5852683	+	Intergenic	Intergenic	-36983	NM_001258452	0.026596	189	56	6.50352	NA	5.25436	5.71316	6.38271	6.11491	5.352	6.87597	7.11495	-1.06292	-3.09971	0.0193288
CD19	chr10:72331993:72332307	chr10	72331993	72332307	+	TTS (NM_001002762)	TTS (NM_001002762)	22999	NM_017626	0.044586	315	70	7.36561	NA	7.5091	8.08438	7.56514	7.57437	7.69906	7.14214	6.96995	0.49967	2.93017	0.0242724
CD19	chr10:80205463:80205697	chr10	80205463	80205697	+	promoter-TSS (NM_001278407)	promoter-TSS (NM_001278407)	-8	NM_001278409	0.119658	235	78	6.86045	NA	7.07222	6.50352	6.80105	6.94054	6.63639	7.56802	7.62639	-0.597096	-2.66753	0.0347886
CD19	chr1:109100058:109100308	chr1	109100058	109100308	+	promoter-TSS (NR_003023)	promoter-TSS (NR_003023)	-10	NR_003023	0.096	251	65	6.95756	NA	6.88708	6.50352	6.8084	7.06302	6.60661	7.19036	7.24597	-0.434875	-2.93711	0.0240455
CD19	chr11:100687119:100687351	chr11	100687119	100687351	+	promoter-TSS (NM_152432)	promoter-TSS (NM_152432)	-441	NM_152432	0.103448	233	70	6.50352	NA	5.1074	3.85503	4.51324	4.93026	5.17854	6.56699	6.30987	-0.970334	-3.04449	0.0208082
CD19	chr11:113773702:113773892	chr11	113773702	113773892	+	promoter-TSS (NM_004724)	promoter-TSS (NM_004724)	-34	NM_004724	0.131579	191	69	6.50352	NA	5.7157	5.17134	5.52603	5.93064	5.36775	8.04269	7.50323	-1.47553	-3.19931	0.0169393
CD19	chr11:114159989:114160227	chr11	114159989	114160227	+	intron (NM_001018011, intron 3 of 6)	intron (NM_001018011, intron 3 of 6)	99542	NM_001018011	0.016807	239	57	6.50352	NA	6.56699	6.50352	6.94054	6.69936	6.69936	7.84871	8.22945	-0.958802	-2.57427	0.0396056
CD19	chr11:118401445:118401610	chr11	118401445	118401610	+	non-coding (NR_033759, exon 1 of 4)	non-coding (NR_033759, exon 1 of 4)	138	NR_033759	0.042424	166	47	5.82232	NA	4.79122	2.3086	3.53586	3.56378	3.83241	7.68262	7.29707	-2.2461	-2.86436	0.0265425
CD19	chr11:118791653:118792035	chr11	118791653	118792035	+	promoter-TSS (NM_001257191)	promoter-TSS (NM_001257191)	-581	NM_004397	0.112565	383	76	6.8084	NA	7.25234	6.76514	7.40871	7.20998	7.03638	7.64324	7.26583	-0.465002	-2.53619	0.0417695
CD19	chr11:19240949:19241099	chr11	19240949	19241099	+	promoter-TSS (NM_024680)	promoter-TSS (NM_024680)	-64	NM_024680	0.086667	151	66	6.50352	NA	3.61642	3.53425	4.46297	4.27527	3.95785	7.26131	8.41277	-2.35652	-2.42253	0.0489946
CD19	chr11:33700775:33701029	chr11	33700775	33701029	+	promoter-TSS (NM_001166692)	promoter-TSS (NM_001166692)	-162	NM_001166692	0.137795	255	75	6.81586	NA	7.03212	5.86199	6.93611	6.93611	6.69936	7.13393	7.51508	-0.699056	-2.96582	0.0231302
CD19	chr11:450140:450366	chr11	450140	450366	+	promoter-TSS (NM_001329544)	promoter-TSS (NM_001329544)	-27	NM_001329544	0.106195	227	70	7.35602	NA	6.76514	6.50352	6.92171	7.05541	6.69936	8.13078	8.32528	-1.00506	-3.1404	0.0183115
CD19	chr1:145979445:145979651	chr1	145979445	145979651	+	TTS (NM_032305)	TTS (NM_032305)	14866	NM_001330685	0.014563	207	52	6.56699	NA	6.50352	5.76122	6.50352	6.19084	6.56699	8.11496	8.22039	-1.19573	-2.58349	0.0390996
CD19	chr11:61581052:61581530	chr11	61581052	61581530	+	promoter-TSS (NM_001252065)	promoter-TSS (NM_001252065)	-419	NM_001300773	0.161088	479	79	7.16188	NA	6.88708	7.36154	6.81586	6.92171	6.94408	6.56699	6.66015	0.412754	2.5357	0.0417984
CD19	chr11:62551818:62552184	chr11	62551818	62552184	+	Intergenic	Intergenic	-5141	NM_024060	0.010929	367	50	6.63639	NA	6.74301	6.87597	7.3815	7.09725	6.63639	7.28247	6.89156	-0.407895	-2.42326	0.0489446
CD19	chr11:67403707:67403945	chr11	67403707	67403945	+	promoter-TSS (NM_001256508)	promoter-TSS (NM_001256508)	-87	NM_198517	0.012605	239	66	6.98511	NA	6.823	6.60661	7.24775	6.79297	6.69936	7.53813	7.3717	-0.558048	-3.09816	0.0193689
CD19	chr1:167721782:167721972	chr1	167721782	167721972	+	promoter-TSS (NM_001146191)	promoter-TSS (NM_001146191)	-73	NM_001146191	0.110526	191	72	6.50352	NA	6.18612	5.68178	5.66313	6.28641	5.86071	8.37651	8.35349	-1.47133	-2.4722	0.0456887
CD19	chr11:72738856:72739122	chr11	72738856	72739122	+	intron (NM_001040118, intron 1 of 34)	intron (NM_001040118, intron 1 of 34)	13400	NM_001040118	0.018797	267	62	6.72864	NA	6.56699	6.50352	6.50352	6.94408	6.27689	7.30562	7.34584	-0.599523	-2.69634	0.033429
CD19	chr11:73152952:73153339	chr11	73152952	73153339	+	Intergenic	Intergenic	-11047	NM_014824	0.010336	388	55	6.93611	NA	7.22776	7.30961	6.84244	6.86045	6.91739	6.66015	6.823	0.367222	2.5799	0.0392959
CD19	chr1:179293617:179293849	chr1	179293617	179293849	+	promoter-TSS (NM_001252512)	promoter-TSS (NM_001252512)	19	NM_001252512	0.103448	233	74	6.87597	NA	6.39436	6.19713	6.74301	6.56699	6.74301	8.09015	8.05399	-1.03717	-2.83828	0.027504
CD19	chr1:182484674:182484900	chr1	182484674	182484900	+	intron (NM_001137669, intron 6 of 21)	L1M2a|LINE|L1	34666	NM_001137669	0	227	56	6.74301	NA	5.77709	5.32402	5.80983	5.68992	5.65324	6.99059	6.75427	-0.748212	-2.84203	0.0273635
CD19	chr12:132149668:132149792	chr12	132149668	132149792	+	intron (NM_024078, intron 9 of 14)	CpG-6292	5303	NM_024078	0.080645	125	68	6.50352	NA	3.97426	2.29946	5.50908	4.87433	5.02281	6.56699	6.17493	-2.02676	-4.4786	0.00354742
CD19	chr12:15789211:15789493	chr12	15789211	15789493	+	5' UTR (NM_004447, exon 1 of 21)	5' UTR (NM_004447, exon 1 of 21)	224	NM_004447	0.148936	283	74	6.71514	NA	6.36488	5.02741	5.97358	6.16077	5.73768	6.60661	7.04723	-0.791578	-3.01182	0.0217405
Cell-Type	ATAC_ID	Chr	Start	End	Strand	Annotation	Detailed Annotation	Distance to.TSS	Nearest PromoterID	CpG	widths	GC Percentage	1_ATAC	2_ATAC	3_ATAC	5_ATAC	7_ATAC	8_ATAC	9_ATAC	10_ATAC	11_ATAC	logFC	t.stat	p.value
CD19	chr1:226110564:226110824	chr1	226110564	226110824	+	Intergenic	CpG	47967	NR_002315	0.126923	261	76	6.50352	NA	6.33546	6.7746	6.823	6.92171	6.10387	7.12976	7.19036	-0.569248	-2.76273	0.0305046
CD19	chr1:236097285:236097435	chr1	236097285	236097435	+	Intergenic	LTR10A|LTR|ERV1	-32179	NM_002508	0.013333	151	57	6.50352	NA	5.56617	4.22758	6.05621	4.23045	4.53741	8.39853	7.45496	-1.94866	-2.67464	0.0344477
CD19	chr12:42144821:42145063	chr12	42144821	42145063	+	promoter-TSS (NM_001099650)	promoter-TSS (NM_001099650)	-71	NM_001099650	0.14876	243	75	6.50352	NA	5.95863	4.56218	5.4908	5.38395	5.6385	6.896	7.00378	-0.951232	-2.96674	0.0231015
CD19	chr12:53493048:53493312	chr12	53493048	53493312	+	intron (NM_006301, intron 1 of 14)	CpG	6480	NM_006301	0.102273	265	74	6.83628	NA	6.74301	6.06062	6.56699	6.56699	6.86614	7.55109	7.15939	-0.544686	-2.63977	0.0361543
CD19	chr12:54359138:54359460	chr12	54359138	54359460	+	intron (NR_120487, intron 1 of 3)	intron (NR_120487, intron 1 of 3)	5187	NM_020370	0.059006	323	61	6.9509	NA	7.03419	7.7701	7.32274	7.02538	7.53972	6.67941	7.31525	0.414888	2.41513	0.0495081
CD19	chr12:7130310:7130460	chr12	7130310	7130460	+	promoter-TSS (NM_014718)	promoter-TSS (NM_014718)	14	NM_014718	0.066667	151	66	5.82188	NA	5.21074	4.63255	5.21505	4.88825	4.83985	8.40531	8.39023	-2.08766	-2.53624	0.0417665
CD19	chr1:27490064:27490328	chr1	27490064	27490328	+	promoter-TSS (NM_001201404)	promoter-TSS (NM_001201404)	-9	NM_006990	0.098485	265	67	7.27651	NA	7.28493	6.84825	7.31052	7.31359	6.88708	7.41713	7.36495	-0.355139	-2.48407	0.0449336
CD19	chr12:89950008:89950140	chr12	89950008	89950140	+	TTS (NR_135019)	TTS (NR_135019)	2381	NR_135019	0.015152	133	46	6.07757	NA	4.9555	3.39757	3.8407	4.7018	4.92542	8.39198	8.60156	-2.33459	-2.43782	0.0479516
CD19	chr1:32072795:32073332	chr1	32072795	32073332	+	intron (NM_001319678, intron 1 of 6)	CpG	164	NM_001319678	0.106145	538	70	7.09169	NA	7.69173	7.54711	7.04932	7.39518	7.67806	6.92531	6.87597	0.519729	2.61965	0.0371795
CD19	chr13:34942209:34942359	chr13	34942209	34942359	+	promoter-TSS (NM_015678)	promoter-TSS (NM_015678)	-3	NM_015678	0.086667	151	72	6.14302	NA	4.25616	3.54445	4.02824	4.26843	3.82078	8.62319	8.40959	-2.67925	-2.62798	0.0367517
CD19	chr13:74287921:74288065	chr13	74287921	74288065	+	Intergenic	Intergenic	56549	NR_144451	0.013889	145	54	6.50352	NA	5.17179	4.22273	5.41746	4.60943	4.86519	8.36982	8.63302	-2.19787	-2.61873	0.037227
CD19	chr1:3772435:3772823	chr1	3772435	3772823	+	promoter-TSS (NM_001288583)	promoter-TSS (NM_001288583)	-132	NM_001288583	0.100515	389	79	7.66431	NA	7.51563	7.82921	7.53867	7.36963	7.63768	7.13112	7.10048	0.439472	2.84875	0.0271136
CD19	chr1:38046758:38046954	chr1	38046758	38046954	+	promoter-TSS (NM_002699)	promoter-TSS (NM_002699)	-78	NM_002699	0.178571	197	85	6.60661	NA	4.90657	4.05665	5.4662	5.33731	5.7472	7.37891	7.30319	-1.57272	-3.46454	0.0120039
CD19	chr13:97222144:97222332	chr13	97222144	97222332	+	promoter-TSS (NM_001306070)	promoter-TSS (NM_001306070)	-51	NM_001306070	0.021277	189	52	6.63639	NA	6.1263	5.19323	5.7255	5.95926	6.09744	8.00177	8.41889	-1.43199	-2.51564	0.0429883
CD19	chr1:40039900:40040100	chr1	40039900	40040100	+	promoter-TSS (NM_001105530)	promoter-TSS (NM_001105530)	-583	NM_006367	0.065	201	63	6.50352	NA	5.88	4.39184	5.78952	5.81405	6.14865	6.99331	7.23164	-1.14545	-3.44564	0.012298
CD19	chr1:40373577:40373837	chr1	40373577	40373837	+	promoter-TSS (NM_022733)	promoter-TSS (NM_022733)	1	NM_022733	0.092308	261	72	6.80105	NA	6.84244	6.84825	7.14083	7.03419	6.76514	7.73231	7.28989	-0.540683	-2.91164	0.0248899
CD19	chr14:100306439:100306675	chr14	100306439	100306675	+	promoter-TSS (NM_001039355)	promoter-TSS (NM_001039355)	-10	NM_001039355	0.165254	237	81	6.67941	NA	6.30419	5.50618	6.56699	6.81586	6.12993	7.10202	7.11942	-0.958842	-6.33297	0.000553123
CD19	chr14:102087053:102087303	chr14	102087053	102087303	+	promoter-TSS (NM_005348)	promoter-TSS (NM_005348)	-3	NM_005348	0.172	251	77	6.87597	NA	6.63639	5.06729	6.7746	6.71514	6.91739	6.97893	6.90084	-0.756819	-2.56588	0.0400722
CD19	chr14:23953575:23953725	chr14	23953575	23953725	+	promoter-TSS (NM_001282987)	promoter-TSS (NM_001282987)	-85	NM_021004	0.1	151	74	6.13574	NA	4.93144	3.55705	4.3021	4.99128	4.4819	8.59932	8.58576	-2.59947	-2.9595	0.0233282
CD19	chr14:50065060:50065184	chr14	50065060	50065184	+	intron (NR_131171, intron 2 of 8)	MLT1I|LTR|ERVL-MaLR	39921	NR_131171	0.024194	125	46	6.06067	NA	4.55258	4.03652	4.78767	4.66963	4.42542	7.83491	8.72449	-2.30644	-2.53709	0.0417172
CD19	chr14:51847278:51847525	chr14	51847278	51847525	+	Intergenic	Intergenic	-12903	NM_053064	0.024291	248	50	6.86045	NA	6.80105	6.56699	6.66015	7.03864	6.28581	7.55109	7.84925	-0.765068	-2.6656	0.034882
CD19	chr14:57390341:57390720	chr14	57390341	57390720	+	promoter-TSS (NM_001011713)	promoter-TSS (NM_001011713)	-23	NM_001011713	0.084433	380	69	7.33734	NA	6.88199	6.71514	7.4651	7.50119	6.93611	7.12976	7.5022	-0.48103	-2.49356	0.0443398
CD19	chr14:61890091:61890241	chr14	61890091	61890241	+	Intergenic	Intergenic	-105657	NM_031914	0	151	47	5.88323	NA	4.89251	3.45661	3.67373	5.07269	4.36509	8.4073	8.34545	-2.48093	-2.69739	0.0333804
CD19	chr1:46247359:46247854	chr1	46247359	46247854	+	promoter-TSS (NM_003579)	promoter-TSS (NM_003579)	-89	NM_001142548	0.084848	496	66	7.71675	NA	7.65466	7.80243	7.34095	7.48013	7.58793	7.17769	7.42699	0.369002	2.65563	0.0353674
CD19	chr14:64338693:64338843	chr14	64338693	64338843	+	promoter-TSS (NR_073496)	promoter-TSS (NR_073496)	-218	NR_073496	0.093333	151	68	6.50352	NA	5.23756	5.25639	5.29023	5.47313	4.86169	8.83364	8.41533	-2.03613	-2.48397	0.0449404
CD19	chr14:75294087:75294433	chr14	75294087	75294433	+	promoter-TSS (NR_038421)	promoter-TSS (NR_038421)	-144	NR_038421	0.112717	347	72	7.48857	NA	7.29308	7.08117	7.62132	7.58018	7.18478	7.66933	7.46789	-0.386618	-2.89163	0.0255753
CD19	chr1:51617002:51617188	chr1	51617002	51617188	+	non-coding (NR_036662, exon 1 of 23)	non-coding (NR_036662, exon 1 of 23)	221	NM_148906	0.080645	187	64	6.50352	NA	5.61291	5.13189	5.55405	5.41887	5.2766	8.09015	8.33257	-1.65708	-2.46624	0.0460733
CD19	chr15:38564702:38564914	chr15	38564702	38564914	+	promoter-TSS (NM_001128602)	promoter-TSS (NM_001128602)	-2	NM_005739	0.141509	213	76	6.50352	NA	5.70308	5.80547	5.93076	6.10806	5.97751	7.3465	7.33802	-0.899122	-2.53115	0.0420651
CD19	chr15:40564950:40565193	chr15	40564950	40565193	+	promoter-TSS (NM_001289132)	promoter-TSS (NM_001289132)	-14	NM_001080791	0.069959	244	64	6.7746	NA	7.25865	6.823	7.14875	7.08477	6.92171	7.97486	7.98257	-0.692188	-2.46775	0.0459751
CD19	chr15:40807406:40807706	chr15	40807406	40807706	+	promoter-TSS (NM_018163)	promoter-TSS (NM_018163)	-78	NM_018163	0.08	301	63	7.05927	NA	6.86614	7.18699	6.56699	6.56699	7.29936	6.83628	6.69936	0.436082	2.61594	0.037372
CD19	chr15:45402154:45402420	chr15	45402154	45402420	+	promoter-TSS (NM_001321015)	promoter-TSS (NM_001321015)	30	NM_001321015	0.082707	267	58	7.16791	NA	6.63639	6.23918	6.99331	6.56699	6.01189	7.18009	7.01798	-0.591088	-2.50779	0.0434636
CD19	chr15:48331227:48331377	chr15	48331227	48331377	+	promoter-TSS (NM_001025248)	promoter-TSS (NM_001025248)	-122	NM_001025248	0.06	151	65	5.62749	NA	3.8003	2.29793	4.10575	3.16503	4.49911	8.35844	8.54922	-2.89155	-2.56504	0.0401189
CD19	chr15:84571083:84571279	chr15	84571083	84571279	+	promoter-TSS (NR_003661)	promoter-TSS (NR_003661)	47	NR_038273	0.061224	197	62	6.50352	NA	4.26276	3.73244	4.83916	4.55683	4.16603	6.56699	6.60661	-1.52051	-2.98353	0.0225843
CD19	chr15:84928280:84928430	chr15	84928280	84928430	+	intron (NM_001287761, intron 11 of 14)	intron (NM_001287761, intron 11 of 14)	43694	NM_201651	0.006667	151	54	6.50352	NA	5.11089	4.23912	4.58394	5.15024	4.97884	7.92408	8.4456	-1.93172	-2.44243	0.0476416
CD19	chr15:90352084:90352310	chr15	90352084	90352310	+	promoter-TSS (NM_001004309)	promoter-TSS (NM_001004309)	-48	NM_001004309	0.048673	227	55	6.60661	NA	5.98298	5.60487	5.94217	5.96415	5.66381	7.00627	6.76514	-0.696005	-2.97397	0.0228772
CD19	chr15:90994535:90994773	chr15	90994535	90994773	+	promoter-TSS (NM_003981)	promoter-TSS (NM_003981)	-3	NM_199413	0.130252	239	70	6.7746	NA	6.32	4.96485	7.14083	6.67941	6.36913	7.28493	7.65885	-1.3777	-4.82916	0.00241172
CD19	chr15:98852401:98852551	chr15	98852401	98852551	+	intron (NM_001291858, intron 2 of 20)	CpG	68050	NR_039864	0.073333	151	65	6.50352	NA	4.15182	3.52444	4.33552	4.20727	3.74489	8.09337	8.49072	-2.56696	-2.59756	0.0383401
CD19	chr16:2459923:2460173	chr16	2459923	2460173	+	promoter-TSS (NM_025108)	promoter-TSS (NM_025108)	-66	NM_025108	0.092	251	73	7.16188	NA	7.23164	6.71514	7.05541	7.44502	7.03638	7.4742	7.28651	-0.376096	-2.49373	0.0443291
CD19	chr16:30527317:30527620	chr16	30527317	30527620	+	promoter-TSS (NM_024671)	promoter-TSS (NM_024671)	-879	NM_024671	0.072607	304	70	6.7746	NA	6.80105	6.76514	7.23065	7.24424	6.83628	7.27651	7.03212	-0.407431	-3.04122	0.0208996
CD19	chr16:324996:325146	chr16	324996	325146	+	intron (NR_134879, intron 2 of 8)	CpG	27605	NM_181050	0.093333	151	71	5.9949	NA	4.34894	3.54348	4.38497	3.85682	3.35303	8.14449	8.33635	-2.59238	-2.53736	0.0417012
CD19	chr16:50152827:50153379	chr16	50152827	50153379	+	intron (NM_001040285, intron 1 of 12)	CpG	185	NM_001040284	0.143116	553	78	7.36888	NA	7.19036	7.29069	6.83628	6.74301	7.07222	6.76514	6.96995	0.397212	2.70916	0.0328418
CD19	chr16:54929187:54929379	chr16	54929187	54929379	+	promoter-TSS (NM_001308963)	promoter-TSS (NM_001308963)	-94	NR_034105	0.067708	193	69	6.50352	NA	6.03548	4.8392	5.16666	5.57035	5.38232	8.15164	8.30254	-1.62757	-2.45797	0.0466118
CD19	chr16:57447312:57447642	chr16	57447312	57447642	+	promoter-TSS (NM_001308358)	promoter-TSS (NM_001308358)	51	NM_001308347	0.121212	331	73	7.30092	NA	7.2703	7.25696	6.63639	6.92171	7.55203	7.03864	6.96707	0.421237	2.61629	0.0373535
CD19	chr16:72172371:72172563	chr16	72172371	72172563	+	promoter-TSS (NM_031293)	promoter-TSS (NM_031293)	-17	NM_001160213	0.010417	193	45	6.50352	NA	4.77429	4.65682	4.72391	5.60051	5.30785	7.67454	7.84871	-1.64052	-2.47809	0.0453124
CD19	chr16:81314756:81315022	chr16	81314756	81315022	+	promoter-TSS (NM_022041)	promoter-TSS (NM_022041)	-77	NM_022041	0.116541	267	69	6.8084	NA	7.03212	6.50352	7.12538	7.00088	6.88199	7.59035	7.31052	-0.552487	-3.31128	0.0146288
CD19	chr17:30116661:30116855	chr17	30116661	30116855	+	promoter-TSS (NM_001261467)	promoter-TSS (NM_001261467)	-49	NM_001261467	0.108247	195	59	6.50352	NA	5.46782	3.75755	5.4548	5.60735	4.63424	7.22776	7.59784	-1.94391	-4.55381	0.00326072
CD19	chr17:40054345:40054533	chr17	40054345	40054533	+	non-coding (NR_052017, exon 1 of 25)	non-coding (NR_052017, exon 1 of 25)	197	NM_001267797	0.042553	189	50	6.56699	NA	5.59063	3.71644	5.12422	5.73025	5.49634	7.70089	8.1349	-1.96702	-3.60842	0.0100018
CD19	chr17:45226135:45226396	chr17	45226135	45226396	+	intron (NM_005892, intron 1 of 26)	intron (NM_005892, intron 1 of 26)	4340	NM_005892	0.030651	262	65	6.87597	NA	7.35807	6.896	7.83927	7.32823	7.16425	7.7799	7.47049	-0.553567	-2.6671	0.0348094
CD19	chr17:48908995:48909145	chr17	48908995	48909145	+	promoter-TSS (NR_135674)	promoter-TSS (NR_135674)	-87	NR_135674	0.08	151	69	6.1466	NA	4.66999	4.64216	4.98307	5.03994	4.55921	8.28349	8.39107	-2.18104	-2.59328	0.0385695
CD19	chr17:49708144:49708378	chr17	49708144	49708378	+	promoter-TSS (NM_001278784)	promoter-TSS (NM_001278784)	-310	NM_001278784	0.055556	235	58	6.50352	NA	7.04519	6.7746	7.04111	7.08842	6.85403	8.15668	7.90516	-0.833237	-2.62235	0.0370401
CD19	chr17:51259898:51260398	chr17	51259898	51260398	+	promoter-TSS (NM_016001)	promoter-TSS (NM_016001)	-82	NM_017643	0.064	501	62	6.86045	NA	6.66015	6.896	7.12251	6.98511	6.72864	7.40131	7.22967	-0.419728	-2.65448	0.0354239
CD19	chr17:58344471:58344659	chr17	58344471	58344659	+	TTS (NM_003168)	TTS (NM_003168)	7363	NR_038416	0.010638	189	56	6.50352	NA	5.75646	5.20612	5.43934	6.0696	6.12613	7.70911	7.91485	-1.25882	-2.48174	0.0450812
CD19	chr17:64662104:64662532	chr17	64662104	64662532	+	promoter-TSS (NM_022739)	promoter-TSS (NM_022739)	-50	NM_022739	0.14486	429	80	7.33199	NA	6.76514	7.23164	6.56699	6.63639	6.90939	6.67941	6.34999	0.492373	2.51392	0.0430924
CD19	chr17:75456450:75456680	chr17	75456450	75456680	+	5' UTR (NM_001321149, exon 1 of 32)	5' UTR (NM_001321149, exon 1 of 32)	101	NM_014738	0.065217	231	62	6.60661	NA	6.38106	6.60661	6.90084	6.79297	6.20458	7.3622	7.81602	-0.812585	-2.90531	0.0251045
CD19	chr17:78132385:78132617	chr17	78132385	78132617	+	promoter-TSS (NM_007267)	promoter-TSS (NM_007267)	-74	NM_007267	0.047414	233	68	6.50352	NA	6.56699	6.60661	7.26675	6.92171	7.03864	7.69952	7.52518	-0.711948	-2.97439	0.022864
CD19	chr17:78337553:78337703	chr17	78337553	78337703	+	Intergenic	Intergenic	22451	NM_003955	0.033333	151	56	6.10988	NA	4.38644	3.58464	4.15353	4.96006	3.98055	8.40433	8.31991	-2.67073	-3.0278	0.0212791
CD19	chr17:81937252:81937450	chr17	81937252	81937450	+	promoter-TSS (NM_001282281)	promoter-TSS (NM_001282281)	-23	NM_001282280	0.166667	199	79	6.56699	NA	5.8051	5.00781	5.96364	5.45116	5.57409	7.13112	7.29308	-1.0725	-2.91498	0.0247775
CD19	chr17:82648473:82648659	chr17	82648473	82648659	+	promoter-TSS (NM_019613)	promoter-TSS (NM_019613)	-31	NM_019613	0.150538	187	75	6.50352	NA	5.9754	5.47304	5.48952	5.85324	4.86608	7.93261	7.41943	-1.34317	-2.52036	0.0427053
CD19	chr17:82751561:82752060	chr17	82751561	82752060	+	promoter-TSS (NM_005993)	promoter-TSS (NM_005993)	-254	NM_005993	0.142285	500	80	6.86614	NA	6.75427	7.33356	6.71514	6.72864	7.18478	6.69936	6.60661	0.425463	2.71466	0.0325934
Cell-Type	ATAC_ID	Chr	Start	End	Strand	Annotation	Detailed Annotation	Distance to.TSS	Nearest PromoterID	CpG	widths	GC Percentage	1_ATAC	2_ATAC	3_ATAC	5_ATAC	7_ATAC	8_ATAC	9_ATAC	10_ATAC	11_ATAC	logFC	t.stat	p.value
CD19	chr18:32091787:32092121	chr18	32091787	32092121	+	promoter-TSS (NM_016271)	promoter-TSS (NM_016271)	99	NM_016271	0.11976	335	73	6.97303	NA	6.56699	6.50352	7.24424	6.93611	6.30559	7.32344	6.89156	-0.593375	-3.10695	0.0191433
CD19	chr18:3448010:3448212	chr18	3448010	3448212	+	intron (NM_173207, intron 1 of 2)	CpG	525	NM_173207	0.089109	203	60	6.50352	NA	5.14711	5.20866	5.70466	5.51585	4.88725	7.41832	8.31941	-1.64107	-2.4557	0.0467605
CD19	chr18:50307765:50307915	chr18	50307765	50307915	+	Intergenic	Intergenic	-19518	NM_001101654	0.06	151	59	5.70501	NA	5.42248	2.32696	4.8717	5.28737	4.81633	7.56615	8.5043	-2.74501	-3.78773	0.00800271
CD19	chr18:54224479:54224919	chr18	54224479	54224919	+	promoter-TSS (NM_003927)	promoter-TSS (NM_003927)	89	NM_003927	0.111364	441	71	7.27568	NA	7.24054	7.14344	7.49705	7.51773	7.00886	7.51669	7.52758	-0.369388	-2.7889	0.0294278
CD19	chr18:62716068:62716267	chr18	62716068	62716267	+	exon (NM_194449, exon 1 of 17)	exon (NM_194449, exon 1 of 17)	728	NM_194449	0.140704	200	74	6.50352	NA	5.0526	4.43419	5.57777	4.64907	5.00608	7.02759	6.56699	-1.15956	-2.71607	0.0325302
CD19	chr18:74495992:74496405	chr18	74495992	74496405	+	promoter-TSS (NM_018235)	promoter-TSS (NM_018235)	-67	NM_018235	0.099274	414	71	7.79572	NA	7.55552	6.98511	7.6483	7.6986	7.43567	7.85529	8.14131	-0.52893	-3.16308	0.0177693
CD19	chr1:88891381:88891631	chr1	88891381	88891631	+	5' UTR (NM_001514, exon 1 of 7)	5' UTR (NM_001514, exon 1 of 7)	112	NM_001514	0.112	251	65	6.75427	NA	5.83541	4.96251	6.17065	5.78647	5.71963	6.83628	7.2002	-1.00909	-3.38572	0.0132832
CD19	chr19:10251792:10252015	chr19	10251792	10252015	+	promoter-TSS (NM_015956)	promoter-TSS (NM_015956)	-61	NM_015956	0.044843	224	55	6.86614	NA	7.10048	6.50352	6.94054	6.8084	6.60661	7.7653	8.1085	-0.784994	-2.4628	0.046296
CD19	chr19:2051148:2051439	chr19	2051148	2051439	+	promoter-TSS (NM_017572)	promoter-TSS (NM_017572)	-49	NM_199054	0.158076	292	78	7.59453	NA	7.43751	6.82979	7.46734	7.3834	7.54915	8.08844	7.70911	-0.484115	-3.0801	0.0198408
CD19	chr19:20661565:20661792	chr19	20661565	20661792	+	promoter-TSS (NM_001076675)	promoter-TSS (NM_001076675)	-82	NM_145297	0.030837	228	57	6.56699	NA	6.56699	6.56699	6.80105	7.02759	6.69936	7.38839	7.86864	-0.719283	-2.75341	0.0308981
CD19	chr19:35748231:35748548	chr19	35748231	35748548	+	promoter-TSS (NM_019104)	promoter-TSS (NM_019104)	28	NM_019104	0.050473	318	55	7.69124	NA	7.80666	8.14952	7.75083	7.77345	7.74301	7.28163	7.2415	0.448404	2.71513	0.0325722
CD19	chr19:35775232:35775561	chr19	35775232	35775561	+	promoter-TSS (NM_001172630)	promoter-TSS (NM_001172630)	-119	NM_052948	0.094225	330	68	7.39154	NA	7.47104	7.74483	6.97893	7.59643	7.66933	6.97893	7.14875	0.468732	2.51648	0.0429375
CD19	chr1:93879096:93879280	chr1	93879096	93879280	+	promoter-TSS (NM_014597)	promoter-TSS (NM_014597)	18	NM_014597	0.108696	185	62	6.50352	NA	4.10636	3.6852	4.72246	4.97474	4.89286	7.22874	6.66015	-1.69794	-3.4365	0.0124429
CD19	chr19:39410038:39410304	chr19	39410038	39410304	+	promoter-TSS (NR_039755)	promoter-TSS (NR_039755)	-493	NR_039755	0.109023	267	73	6.50352	NA	6.76514	6.9509	7.44616	6.86045	6.36447	7.85737	7.20262	-0.697799	-2.49954	0.0439692
CD19	chr19:44753310:44753718	chr19	44753310	44753718	+	intron (NM_005178, intron 2 of 8)	intron (NM_005178, intron 2 of 8)	4793	NM_005178	0.051471	409	67	7.53813	NA	7.13112	6.72864	7.65415	7.54325	7.15939	7.49377	7.58697	-0.531374	-3.18139	0.0173445
CD19	chr19:55599419:55599773	chr19	55599419	55599773	+	promoter-TSS (NM_032836)	promoter-TSS (NM_032836)	-69	NM_032836	0.064972	355	67	6.72864	NA	6.90503	7.40435	6.99059	6.81586	7.03864	6.56699	6.8084	0.357433	2.88324	0.025869
CD19	chr19:58098189:58098453	chr19	58098189	58098453	+	promoter-TSS (NM_001145543)	promoter-TSS (NM_001145543)	42	NM_023926	0.113636	265	68	6.8084	NA	7.18478	7.09555	7.38468	7.49535	7.07587	7.89988	7.33521	-0.499852	-2.55939	0.0404367
CD19	chr19:58519859:58520009	chr19	58519859	58520009	+	promoter-TSS (NM_001316981)	promoter-TSS (NM_001316981)	75	NM_001316981	0.08	151	58	6.50352	NA	5.36498	4.66059	5.1509	5.20075	4.39052	8.5558	8.44997	-2.19575	-2.70833	0.0328794
CD19	chr19:9140302:9140490	chr19	9140302	9140490	+	promoter-TSS (NM_020933)	promoter-TSS (NM_020933)	16	NM_001190791	0.074468	189	56	6.50352	NA	5.08067	3.76814	4.84028	5.46985	5.63724	6.60661	6.7746	-1.20076	-3.20281	0.0168615
CD19	chr19:9309585:9309935	chr19	9309585	9309935	+	promoter-TSS (NM_198535)	promoter-TSS (NM_198535)	-46	NM_198535	0.1	351	70	7.40435	NA	7.07926	7.02977	6.26402	6.72864	7.05344	6.56699	6.66015	0.525196	3.16791	0.0176564
CD19	chr20:31951963:31952219	chr20	31951963	31952219	+	promoter-TSS (NM_030815)	promoter-TSS (NM_030815)	-11	NM_030815	0.113281	257	69	6.67941	NA	6.80105	6.71514	7.03864	7.20579	7.07396	7.26675	7.63113	-0.48012	-2.43969	0.0478255
CD19	chr20:3407458:3407843	chr20	3407458	3407843	+	promoter-TSS (NM_001009984)	promoter-TSS (NM_001009984)	12	NM_001009984	0.142857	386	79	6.50352	NA	5.95903	3.94367	5.83005	5.14242	5.33557	6.63639	6.1478	-0.985674	-3.90113	0.00696768
CD19	chr20:36951646:36951826	chr20	36951646	36951826	+	5' UTR (NM_015474, exon 1 of 16)	5' UTR (NM_015474, exon 1 of 16)	107	NM_015474	0.072222	181	67	6.50352	NA	5.42993	4.33956	5.41681	4.88983	5.77186	8.04493	7.33052	-1.48348	-2.74753	0.0311493
CD19	chr20:47894818:47894996	chr20	47894818	47894996	+	Intergenic	D20S16|Satellite|Satellite	-88319	NR_109942	0.033708	179	59	6.50352	NA	3.83813	4.3469	5.07159	5.52704	4.27767	6.56699	7.62785	-1.845	-2.65416	0.0354396
CD19	chr20:57398259:57398728	chr20	57398259	57398728	+	intron (NM_017495, intron 3 of 3)	intron (NM_017495, intron 3 of 3)	7095	NM_017495	0.055437	470	67	7.99384	NA	8.04416	7.28493	8.02288	8.00115	7.79897	8.05784	8.16823	-0.396423	-2.43741	0.0479788
CD19	chr2:108533948:108534448	chr2	108533948	108534448	+	promoter-TSS (NR_135290)	promoter-TSS (NR_135290)	21	NR_135290	0.12	501	77	7.56179	NA	6.90939	7.12976	6.80105	6.56699	7.35393	6.75427	6.8084	0.455083	2.45735	0.0466521
CD19	chr2:111884205:111884382	chr2	111884205	111884382	+	promoter-TSS (NM_022662)	promoter-TSS (NM_022662)	-129	NM_022662	0.090395	178	61	6.50352	NA	3.67473	2.43557	3.99144	4.24206	4.23713	7.21108	8.0344	-2.50504	-2.95074	0.0236062
CD19	chr2:112276001:112276187	chr2	112276001	112276187	+	intron (NM_198581, intron 1 of 11)	CpG	493	NM_198581	0.080645	187	63	6.50352	NA	5.1864	4.34015	4.38657	5.50103	5.33907	8.29988	8.31599	-1.91789	-2.44786	0.0472788
CD19	chr2:135530913:135531595	chr2	135530913	135531595	+	promoter-TSS (NM_001286568)	promoter-TSS (NM_001286568)	-18	NM_032143	0.054252	683	54	7.55157	NA	7.61428	6.89156	7.61808	7.47741	7.50428	7.76964	7.74851	-0.385066	-2.4412	0.0477236
CD19	chr21:44873636:44873874	chr21	44873636	44873874	+	non-coding (NR_104597, exon 1 of 5)	non-coding (NR_104597, exon 1 of 5)	148	NM_001286822	0.113445	239	69	6.50352	NA	6.29017	5.58164	6.11732	6.22619	5.54291	6.76514	6.81586	-0.699595	-3.18153	0.0173414
CD19	chr2:177618722:177618910	chr2	177618722	177618910	+	5' UTR (NM_152275, exon 1 of 1)	5' UTR (NM_152275, exon 1 of 1)	150	NM_152275	0.079787	189	53	4.78063	NA	3.3646	2.54036	4.329	4.33993	4.39593	7.84138	8.35133	-3.08451	-3.31237	0.0146079
CD19	chr2:202911577:202911727	chr2	202911577	202911727	+	promoter-TSS (NM_001322429)	promoter-TSS (NM_001322429)	-566	NM_024744	0.04	151	54	6.50352	NA	3.96223	2.36334	4.27638	3.76994	4.68463	6.56699	7.53362	-1.96069	-2.52702	0.0423091
CD19	chr22:31212059:31212308	chr22	31212059	31212308	+	promoter-TSS (NM_005569)	promoter-TSS (NM_005569)	-81	NM_005569	0.120482	250	75	6.86045	NA	6.91332	6.50352	6.72864	6.86045	6.60661	7.39457	7.45119	-0.504819	-2.59227	0.0386242
CD19	chr2:232697242:232697470	chr2	232697242	232697470	+	promoter-TSS (NR_103493)	promoter-TSS (NR_103493)	51	NM_001103147	0.127193	229	74	6.50352	NA	5.09768	5.30147	6.03967	5.65443	5.97652	7.22776	7.07396	-1.05128	-2.63808	0.0362394
CD19	chr22:41197456:41197606	chr22	41197456	41197606	+	promoter-TSS (NR_110514)	promoter-TSS (NR_110514)	-30	NR_110514	0.16	151	82	6.50352	NA	4.97669	3.79117	4.1159	5.4139	4.75096	12.6442	8.66665	-3.86045	-2.74451	0.0312792
CD19	chr2:32010763:32011273	chr2	32010763	32011273	+	promoter-TSS (NR_126032)	promoter-TSS (NR_126032)	34	NR_126034	0.082353	511	66	7.47157	NA	7.29549	7.55795	6.94408	6.90503	7.34307	7.01565	7.02042	0.455011	3.3046	0.0147565
CD19	chr2:43131155:43131659	chr2	43131155	43131659	+	Intergenic	Intergenic	-91864	NR_110585	0.025794	505	61	6.74301	NA	6.87597	7.864	6.91739	6.67941	7.51205	6.823	6.7746	0.621251	2.97749	0.0227687
CD19	chr2:58046597:58046901	chr2	58046597	58046901	+	promoter-TSS (NM_001130481)	promoter-TSS (NM_001130481)	37	NM_001130481	0.105263	305	73	7.15145	NA	7.15012	7.11304	7.40871	7.36495	7.17517	7.51669	7.66025	-0.357915	-2.61648	0.0373439
CD19	chr2:73284827:73284977	chr2	73284827	73284977	+	Intergenic	CpG	8799	NM_001965	0.106667	151	69	6.50352	NA	4.17439	2.31735	4.15424	2.93415	2.65723	7.30017	8.11496	-2.64981	-2.46467	0.0461746
CD19	chr2:95159754:95159946	chr2	95159754	95159946	+	promoter-TSS (NM_001318005)	promoter-TSS (NM_001318005)	-265	NM_032788	0.145833	193	78	6.50352	NA	5.87736	4.934	5.92453	5.64619	5.52095	7.17769	8.2016	-1.38521	-2.58673	0.0389235
CD19	chr3:108222347:108222681	chr3	108222347	108222681	+	promoter-TSS (NM_018010)	promoter-TSS (NM_018010)	56	NM_018010	0.071856	335	64	7.01118	NA	7.51508	7.2748	8.08438	7.69677	7.43063	7.94012	7.60812	-0.497298	-2.53447	0.04187
CD19	chr3:14947452:14947638	chr3	14947452	14947638	+	promoter-TSS (NM_001291694)	promoter-TSS (NM_001291694)	-39	NM_003298	0.177419	187	78	6.8084	NA	6.56699	5.53728	6.17913	5.99849	6.02135	8.11854	7.95235	-1.21357	-2.75715	0.0307396
CD19	chr3:156555080:156555465	chr3	156555080	156555465	+	promoter-TSS (NM_001308204)	promoter-TSS (NM_001308204)	-72	NM_007107	0.080519	386	58	7.77438	NA	7.65885	7.42123	7.73975	8.00566	7.90257	8.30092	8.19168	-0.464281	-2.82464	0.0280218
CD19	chr3:186783139:186783289	chr3	186783139	186783289	+	promoter-TSS (NM_001967)	promoter-TSS (NM_001967)	-358	NM_001967	0.153333	151	75	5.62383	NA	5.08586	4.23556	5.25392	4.74085	4.52781	8.40093	8.44417	-2.36656	-2.82696	0.027933
CD19	chr3:197749649:197749995	chr3	197749649	197749995	+	promoter-TSS (NM_001145642)	promoter-TSS (NM_001145642)	69	NM_032288	0.153179	347	73	7.05927	NA	7.06863	7.34717	6.8084	6.88708	6.95756	6.67941	6.82979	0.365117	2.68919	0.0337612
CD19	chr3:42804447:42804719	chr3	42804447	42804719	+	promoter-TSS (NM_001099668)	promoter-TSS (NM_001099668)	-48	NM_001099669	0.088235	273	69	7.32274	NA	7.2685	6.76514	7.51058	7.31444	7.2915	7.58844	7.91485	-0.517889	-2.81398	0.0284336
CD19	chr3:49803164:49803314	chr3	49803164	49803314	+	promoter-TSS (NM_203370)	promoter-TSS (NM_203370)	-15	NM_203370	0.153333	151	80	6.50352	NA	5.70878	5.15436	5.24464	6.03767	5.65642	8.42019	8.37826	-1.7293	-2.61573	0.0373829
CD19	chr3:49929754:49929946	chr3	49929754	49929946	+	exon (NM_001142501, exon 1 of 5)	exon (NM_001142501, exon 1 of 5)	162	NM_001142501	0.104167	193	72	6.50352	NA	5.50384	5.17954	5.4798	5.8244	5.91812	8.05927	7.74392	-1.41232	-2.68271	0.0340649
CD19	chr3:50359489:50359811	chr3	50359489	50359811	+	promoter-TSS (NM_007024)	promoter-TSS (NM_007024)	-142	NM_007024	0.071429	323	63	7.28076	NA	7.66388	7.89607	7.23164	7.54373	7.8332	7.31525	7.22269	0.428418	2.56886	0.0399055
CD19	chr3:63912677:63912827	chr3	63912677	63912827	+	exon (NM_001177387, exon 2 of 13)	exon (NM_001177387, exon 2 of 13)	14353	NM_001177387	0.146667	151	81	6.50352	NA	4.24966	3.74055	4.23221	4.58138	4.74116	8.24289	8.35418	-2.28167	-2.48854	0.0446527
CD19	chr4:139176992:139177139	chr4	139176992	139177139	+	5' UTR (NM_001331036, exon 1 of 10)	5' UTR (NM_001331036, exon 1 of 10)	153	NM_001331036	0.122449	148	74	5.79278	NA	3.02486	2.31498	3.8685	2.59417	2.68475	8.1339	7.53263	-3.00043	-2.70165	0.0331844
CD19	chr4:153249194:153249425	chr4	153249194	153249425	+	intron (NM_001302693, intron 1 of 2)	CpG	-8050	NM_001302694	0.082251	232	69	6.50352	NA	6.03312	5.99841	6.18853	5.95816	5.52154	7.61428	6.88199	-0.861597	-2.41139	0.0497696
CD19	chr4:184805548:184805698	chr4	184805548	184805698	+	5' UTR (NM_001286710, exon 1 of 21)	5' UTR (NM_001286710, exon 1 of 21)	165	NM_001286710	0.026667	151	64	6.50352	NA	3.48391	3.51764	4.41834	4.55807	3.26029	7.71863	8.40659	-2.78004	-2.79246	0.0292844
CD19	chr4:2756311:2756472	chr4	2756311	2756472	+	promoter-TSS (NM_001161527)	promoter-TSS (NM_001161527)	-15	NM_024309	0.15528	162	85	6.50352	NA	4.49162	2.67773	4.13399	4.72465	3.61616	7.98443	8.54804	-2.91421	-3.35472	0.0138264
CD19	chr4:74932922:74933072	chr4	74932922	74933072	+	promoter-TSS (NM_015393)	promoter-TSS (NM_015393)	-78	NM_015393	0.093333	151	74	6.13391	NA	4.68836	3.56495	5.0243	4.90191	4.83685	8.1769	8.52585	-2.51512	-3.24508	0.0159503
CD19	chr4:932243:932562	chr4	932243	932562	+	promoter-TSS (NM_005255)	promoter-TSS (NM_005255)	-12	NM_005255	0.15674	320	73	6.87597	NA	7.24685	7.22269	6.90939	6.86614	7.2247	6.74301	6.88199	0.35043	2.55253	0.0408262
CD19	chr5:149357740:149358075	chr5	149357740	149358075	+	promoter-TSS (NR_132366)	promoter-TSS (NR_132366)	-100	NM_001301057	0.095522	336	71	7.68309	NA	7.44035	6.99593	7.56565	7.51563	7.18585	7.91263	7.79282	-0.505702	-3.77315	0.00814766
CD19	chr5:157265990:157266277	chr5	157265990	157266277	+	promoter-TSS (NM_001037333)	promoter-TSS (NM_001037333)	53	NM_001291721	0.135889	288	79	7.45934	NA	7.23849	6.74301	7.39398	7.01565	7.00886	7.67544	7.47799	-0.424061	-2.66934	0.0347014
CD19	chr5:157859018:157859210	chr5	157859018	157859210	+	promoter-TSS (NM_001195555)	promoter-TSS (NM_001195555)	61	NM_001195555	0.145833	193	73	6.50352	NA	5.63893	3.74988	5.00044	5.49479	5.56594	8.00969	7.99855	-1.93228	-3.43762	0.0124251
Cell-Type	ATAC_ID	Chr	Start	End	Strand	Annotation	Detailed Annotation	Distance to.TSS	Nearest PromoterID	CpG	widths	GC Percentage	1_ATAC	2_ATAC	3_ATAC	5_ATAC	7_ATAC	8_ATAC	9_ATAC	10_ATAC	11_ATAC	logFC	t.stat	p.value
CD19	chr5:172834201:172834351	chr5	172834201	172834351	+	promoter-TSS (NM_001031711)	promoter-TSS (NM_001031711)	56	NM_001031711	0.153333	151	81	6.50352	NA	5.09537	4.38982	5.1902	5.48073	5.31446	8.50802	8.49471	-2.18897	-3.03327	0.0211234
CD19	chr5:180494141:180494491	chr5	180494141	180494491	+	promoter-TSS (NM_001303241)	promoter-TSS (NM_001303241)	-83	NM_001303241	0.14	351	75	7.64691	NA	7.42759	7.43815	7.04111	7.17655	7.81756	7.12538	7.18355	0.423691	2.76393	0.0304542
CD19	chr5:39074417:39074603	chr5	39074417	39074603	+	promoter-TSS (NM_001285439)	promoter-TSS (NM_001285439)	-102	NM_152756	0.150538	187	80	6.60661	NA	5.00099	4.97265	5.45284	5.54437	5.67046	8.06153	8.31223	-1.7346	-2.53833	0.0416447
CD19	chr5:49602625:49602887	chr5	49602625	49602887	+	Intergenic	(TGGAA)n|Simple_repeat|Simple_repeat	838644	NM_198449	0.019084	263	43	6.63639	NA	6.69936	6.896	7.02042	7.30477	6.69936	7.62785	7.67899	-0.68599	-3.3449	0.0140034
CD19	chr5:49657720:49658170	chr5	49657720	49658170	+	Intergenic	(TCCAT)n|Simple_repeat|Simple_repeat	783455	NM_198449	0.015556	451	40	6.75427	NA	6.56699	6.50352	6.69936	7.24597	6.35767	7.13524	6.90939	-0.509027	-2.85911	0.0267332
CD19	chr5:66144241:66144474	chr5	66144241	66144474	+	promoter-TSS (NM_139168)	promoter-TSS (NM_139168)	139	NM_001323529	0.154506	234	68	5.8489	NA	4.42572	3.85729	5.37599	4.47959	5.35872	6.92531	6.75427	-1.45587	-2.84369	0.0273018
CD19	chr5:81301430:81301670	chr5	81301430	81301670	+	promoter-TSS (NR_034121)	promoter-TSS (NR_034121)	19	NR_034121	0.1	241	61	6.50352	NA	6.56699	6.50352	7.03419	6.56699	6.14429	7.16425	7.65517	-0.709291	-2.604	0.0379982
CD19	chr6:14095522:14095742	chr6	14095522	14095742	+	Intergenic	Intergenic	-21624	NM_001251901	0.022727	221	55	6.50352	NA	6.71514	6.50352	6.56699	6.74301	6.12725	7.83829	7.84806	-0.912379	-2.54751	0.0411134
CD19	chr6:14121943:14122133	chr6	14121943	14122133	+	intron (NM_004233, intron 2 of 4)	intron (NM_004233, intron 2 of 4)	4404	NM_001040280	0.010526	191	49	6.50352	NA	5.56446	5.13575	6.07776	5.78495	5.62306	7.69721	8.34244	-1.62093	-2.94975	0.0236377
CD19	chr6:26171838:26172071	chr6	26171838	26172071	+	TTS (NM_138720)	TTS (NM_138720)	-11842	NM_003523	0.124464	234	68	6.50352	NA	6.74301	6.50352	6.80105	6.63639	6.56699	7.84592	7.20262	-0.656491	-2.44216	0.0476594
CD19	chr6:32637202:32637426	chr6	32637202	32637426	+	promoter-TSS (NM_002122)	promoter-TSS (NM_002122)	-92	NM_002122	0.004464	225	44	6.81586	NA	5.6719	2.424	5.43565	7.03419	6.29937	6.94054	7.79142	-2.21985	-3.30149	0.0148165
CD19	chr6:32666650:32666793	chr6	32666650	32666793	+	promoter-TSS (NM_002123)	promoter-TSS (NM_002123)	-32	NM_002123	0.013986	144	48	6.50352	NA	4.24406	3.46861	5.25183	5.30207	5.47187	8.8484	8.59464	-2.82227	-3.5624	0.0105993
CD19	chr6:35342345:35342573	chr6	35342345	35342573	+	promoter-TSS (NM_006238)	promoter-TSS (NM_006238)	-99	NM_001171818	0.118421	229	75	7.5501	NA	7.12251	6.50352	6.80105	7.06302	6.74301	8.07566	8.31443	-0.848508	-2.66915	0.0347107
CD19	chr6:37791581:37791731	chr6	37791581	37791731	+	Intergenic	Intergenic	-27875	NM_021943	0.013333	151	65	6.50352	NA	3.98592	2.29793	2.77081	3.71407	2.98216	7.73786	8.38589	-2.74008	-2.42535	0.0488002
CD19	chr6:38703091:38703321	chr6	38703091	38703321	+	promoter-TSS (NM_006708)	promoter-TSS (NM_006708)	-30	NM_006708	0.069565	231	60	7.37891	NA	7.08842	7.06109	7.28076	7.10999	7.01565	8.20285	8.30223	-0.725209	-2.41845	0.0492773
CD19	chr6:53545031:53545208	chr6	53545031	53545208	+	promoter-TSS (NM_001498)	promoter-TSS (NM_001498)	10	NM_001197115	0.118644	178	69	6.56699	NA	5.78998	4.77814	5.0124	5.93115	5.04463	7.98443	8.37994	-1.79389	-2.68867	0.0337855
CD19	chr6:53794850:53795000	chr6	53794850	53795000	+	promoter-TSS (NM_018214)	promoter-TSS (NM_018214)	-55	NM_018214	0.153333	151	74	5.62523	NA	5.02682	2.33054	4.05257	4.75938	4.20061	8.30033	8.41224	-2.96181	-3.53636	0.0109546
CD19	chr6:90083976:90084161	chr6	90083976	90084161	+	intron (NM_021813, intron 5 of 8)	intron (NM_021813, intron 5 of 8)	189599	NM_032602	0.010811	186	49	6.50352	NA	5.41156	4.3473	4.90983	4.69357	4.9713	7.68218	7.17655	-1.3871	-2.51029	0.0433119
CD19	chr7:102307026:102307296	chr7	102307026	102307296	+	intron (NM_020979, intron 3 of 8)	intron (NM_020979, intron 3 of 8)	14058	NR_036245	0.033333	271	65	6.76514	NA	5.6574	5.60439	6.50352	6.95756	6.50352	7.35056	7.32274	-1.11064	-4.03775	0.00591229
CD19	chr7:102363589:102363877	chr7	102363589	102363877	+	promoter-TSS (NR_038967)	promoter-TSS (NR_038967)	-86	NM_001347879	0.069444	289	58	7.1915	NA	7.28163	7.33802	6.63639	7.03419	7.00886	6.60661	6.92898	0.439199	2.55223	0.0408431
CD19	chr7:102396071:102396357	chr7	102396071	102396357	+	promoter-TSS (NM_024653)	promoter-TSS (NM_024653)	-143	NM_024653	0.076923	287	63	7.29069	NA	7.06863	6.84825	7.46051	7.13112	7.15145	7.62177	7.46447	-0.41854	-2.82219	0.0281159
CD19	chr7:127392648:127392874	chr7	127392648	127392874	+	promoter-TSS (NM_176814)	promoter-TSS (NM_176814)	-37	NM_176814	0.132743	227	76	6.50352	NA	6.69936	6.20985	6.56699	6.56699	6.18477	7.94466	7.1541	-0.844886	-2.88366	0.0258543
CD19	chr7:130913494:130913644	chr7	130913494	130913644	+	promoter-TSS (NR_110473)	promoter-TSS (NR_110473)	105	NR_109780	0.033333	151	55	6.50352	NA	4.36128	3.59174	4.58929	4.32719	4.4416	8.50367	8.6024	-2.55949	-2.68431	0.0339896
CD19	chr7:140696599:140696749	chr7	140696599	140696749	+	promoter-TSS (NM_004546)	promoter-TSS (NM_004546)	-7	NM_004546	0.12	151	72	6.50352	NA	5.25981	3.54445	4.91494	4.86866	4.6871	7.8043	8.46235	-2.21784	-2.99404	0.0222668
CD19	chr7:143902085:143902277	chr7	143902085	143902277	+	promoter-TSS (NM_014719)	promoter-TSS (NM_014719)	4	NM_001206938	0.072917	193	68	6.50352	NA	6.04769	5.68494	5.8422	6.04553	5.71925	8.33637	8.38062	-1.512	-2.50722	0.0434985
CD19	chr7:151232339:151232565	chr7	151232339	151232565	+	promoter-TSS (NM_001284295)	promoter-TSS (NM_001284295)	-37	NM_019015	0.106195	227	72	6.60661	NA	6.87597	6.16349	6.50352	6.56699	5.81338	7.41713	7.56851	-0.815682	-2.478	0.045318
CD19	chr7:1940444:1940730	chr7	1940444	1940730	+	promoter-TSS (NM_001304525)	promoter-TSS (NM_001304525)	-37	NM_001304525	0.059441	287	67	7.0649	NA	7.30397	7.48957	7.41651	6.69936	7.2002	6.56699	6.86614	0.491706	2.51204	0.0432056
CD19	chr7:30134695:30134988	chr7	30134695	30134988	+	promoter-TSS (NM_152793)	promoter-TSS (NM_152793)	-95	NM_152793	0.150171	294	80	6.50352	NA	5.91129	5.50509	6.32751	6.0007	6.00186	6.67941	6.23751	-0.513349	-3.18532	0.0172549
CD19	chr7:45768924:45769147	chr7	45768924	45769147	+	promoter-TSS (NR_024271)	promoter-TSS (NR_024271)	-17	NR_024271	0.134529	224	68	6.7746	NA	6.76514	6.60661	6.99059	6.99593	6.94408	7.88271	8.29838	-0.879827	-2.63454	0.036418
CD19	chr7:47937433:47937621	chr7	47937433	47937621	+	intron (NM_138295, intron 3 of 56)	L2a|LINE|L2	10947	NM_138295	0.015957	189	56	6.50352	NA	5.08829	4.42077	5.04234	5.13336	5.00324	7.26675	7.82331	-1.55698	-2.57653	0.0394811
CD19	chr8:100950403:100951013	chr8	100950403	100951013	+	promoter-TSS (NM_001135702)	promoter-TSS (NM_001135702)	-137	NM_001135702	0.081967	611	66	7.25139	NA	7.23271	7.20998	7.70135	7.43815	7.41244	7.78708	7.59784	-0.377107	-2.5554	0.0406629
CD19	chr8:11466517:11466781	chr8	11466517	11466781	+	5' UTR (NM_053279, exon 1 of 3)	5' UTR (NM_053279, exon 1 of 3)	118	NM_053279	0.117424	265	74	6.50352	NA	5.0917	5.36294	6.36945	6.02034	5.73084	6.56699	6.37268	-0.826793	-2.89938	0.0253077
CD19	chr8:122782371:122782634	chr8	122782371	122782634	+	intron (NM_014943, intron 1 of 3)	CpG-27546	840	NM_014943	0.106464	264	71	6.71514	NA	5.61856	4.99898	6.3235	5.52316	5.82091	6.56699	6.29012	-0.672662	-2.55192	0.0408608
CD19	chr8:12436837:12436987	chr8	12436837	12436987	+	promoter-TSS (NM_001137610)	promoter-TSS (NM_001137610)	-101	NR_040091	0.093333	151	74	6.50352	NA	5.53947	3.55705	4.70008	4.48157	2.18449	8.56246	8.41237	-2.91942	-2.63647	0.0363204
CD19	chr8:124637490:124637758	chr8	124637490	124637758	+	intron (NM_001282974, intron 3 of 13)	intron (NM_001282974, intron 3 of 13)	90883	NM_001282971	0.014925	269	55	6.50352	NA	6.81586	6.74301	7.00627	6.98511	6.75427	7.50323	7.23948	-0.499989	-2.71229	0.0327001
CD19	chr8:127197017:127197167	chr8	127197017	127197167	+	intron (NR_120364, intron 1 of 2)	intron (NR_120364, intron 1 of 2)	535	NR_120364	0	151	57	6.50352	NA	5.4872	3.57831	4.26598	4.78401	5.18701	8.57602	8.48502	-2.1588	-2.52921	0.0421794
CD19	chr8:140596768:140597172	chr8	140596768	140597172	+	intron (NM_001164623, intron 1 of 17)	intron (NM_001164623, intron 1 of 17)	38577	NM_001164623	0.037129	405	58	6.50352	NA	6.86045	7.85581	7.2247	6.66015	7.45549	6.60661	6.75427	0.596801	3.03086	0.021192
CD19	chr8:141089495:141089729	chr8	141089495	141089729	+	Intergenic	Intergenic	-39009	NM_014957	0.034188	235	65	6.50352	NA	6.38366	5.55616	5.99497	5.76412	5.69441	7.35188	6.823	-0.734028	-2.50785	0.0434601
CD19	chr8:37880956:37881106	chr8	37880956	37881106	+	intron (NM_001002814, intron 1 of 5)	intron (NM_001002814, intron 1 of 5)	18466	NM_025151	0.02	151	54	6.11063	NA	5.21653	4.68815	4.98484	5.28761	4.97884	8.55699	8.64942	-2.1522	-2.55787	0.0405225
CD19	chr8:60916500:60916727	chr8	60916500	60916727	+	Intergenic	L2c|LINE|L2	51135	NR_034003	0.013216	228	51	6.97893	NA	6.90503	6.50352	6.80105	6.76514	6.38199	8.07658	8.14449	-0.952981	-2.67475	0.0344428
CD19	chr8:688253:688403	chr8	688253	688403	+	intron (NM_207332, intron 3 of 5)	(CCCCG)n|Simple_repeat|Simple_repeat	42911	NM_207332	0.126667	151	82	6.50352	NA	5.51267	2.56466	4.38933	3.94531	5.0653	7.6986	8.40646	-2.11154	-2.42806	0.0486146
CD19	chr8:89984088:89984439	chr8	89984088	89984439	+	intron (NM_001024688, intron 1 of 16)	CpG	408	NM_002485	0.088319	352	67	7.31444	NA	7.01565	6.88708	7.44262	7.15272	7.13112	7.80956	7.66838	-0.534247	-3.216	0.0165712
CD19	chr9:112379776:112380024	chr9	112379776	112380024	+	promoter-TSS (NM_001195822)	promoter-TSS (NM_001195822)	-9	NM_001195822	0.100806	249	67	6.50352	NA	5.87843	4.52589	5.90029	5.98935	6.00552	6.66015	6.80105	-0.963772	-4.08479	0.00559093
CD19	chr9:114587527:114587787	chr9	114587527	114587787	+	promoter-TSS (NM_004888)	promoter-TSS (NM_004888)	-57	NM_004888	0.073077	261	62	6.84825	NA	6.90084	6.56699	6.84244	7.08842	6.69936	7.45442	7.59128	-0.585854	-3.077	0.0199231
CD19	chr9:120714526:120714793	chr9	120714526	120714793	+	promoter-TSS (NM_001080497)	promoter-TSS (NM_001080497)	-172	NM_001080497	0.116105	268	72	6.84825	NA	7.27135	7.01339	7.75502	7.21219	7.32667	7.79005	7.91485	-0.561156	-2.44697	0.0473383
CD19	chr9:127699420:127699570	chr9	127699420	127699570	+	Intergenic	CpG	-7497	NM_001012502	0.066667	151	63	6.14554	NA	5.79096	4.16629	5.43144	4.92939	5.72278	8.51023	8.6097	-2.02272	-2.55714	0.0405639
CD19	chr9:129888348:129888808	chr9	129888348	129888808	+	3' UTR (NM_015033, exon 17 of 17)	3' UTR (NM_015033, exon 17 of 17)	18973	NR_106914	0.041304	461	59	7.25409	NA	6.90084	7.46103	6.71514	6.88199	7.09351	6.56699	6.8084	0.495798	2.96296	0.0232195
CD19	chr9:35815205:35815637	chr9	35815205	35815637	+	promoter-TSS (NM_032593)	promoter-TSS (NM_032593)	-376	NM_032593	0.039352	433	53	7.07396	NA	7.23164	6.60661	7.3909	7.31285	7.29629	7.54662	7.61135	-0.505549	-2.86691	0.0264507
CD19	chr9:36190737:36191004	chr9	36190737	36191004	+	promoter-TSS (NM_001184762)	promoter-TSS (NM_001184762)	14	NM_001311205	0.071161	268	64	7.31138	NA	7.16059	6.67941	7.57484	7.05541	7.09351	8.02361	7.77206	-0.700268	-3.53853	0.0109245
CD19	chr9:70413443:70413593	chr9	70413443	70413593	+	5' UTR (NM_001206, exon 1 of 2)	5' UTR (NM_001206, exon 1 of 2)	1139	NM_001206	0.193333	151	78	6.50352	NA	5.12145	2.42434	5.12846	5.45224	4.92596	8.23211	8.70491	-3.01113	-4.56458	0.00322181
CD19	chr9:80231930:80232080	chr9	80231930	80232080	+	Intergenic	L1PA16|LINE|L1	256982	NR_121212	0.006667	151	56	6.50352	NA	5.13664	3.58926	5.18468	4.40564	5.41608	8.45283	8.49835	-2.22647	-2.68232	0.0340836
CD19	chr9:81689490:81689757	chr9	81689490	81689757	+	promoter-TSS (NR_109772)	promoter-TSS (NR_109772)	-88	NM_005077	0.146067	268	75	7.13944	NA	6.72864	6.7746	6.91332	7.45279	6.69936	7.39022	7.36963	-0.518154	-2.84721	0.0271706
CD19	chrX:13734571:13734823	chrX	13734571	13734823	+	promoter-TSS (NM_001128835)	promoter-TSS (NM_001128835)	-16	NM_003611	0.087302	253	63	6.60661	NA	6.71514	6.50352	6.56699	7.07396	6.56699	7.21949	7.45712	-0.545352	-2.52123	0.0426534
CD19	chrX:41923559:41923815	chrX	41923559	41923815	+	promoter-TSS (NM_001126054)	promoter-TSS (NM_001126054)	-653	NM_001126055	0.160156	257	79	6.50352	NA	5.84705	5.4777	6.25019	6.02121	6.15502	6.67941	6.75427	-0.618166	-3.09086	0.0195581
CD19	chrX:46836782:46836984	chrX	46836782	46836984	+	promoter-TSS (NM_006915)	promoter-TSS (NM_006915)	-29	NM_006915	0.074257	203	63	6.84825	NA	5.84869	6.06866	6.15501	6.19418	5.91299	8.15977	7.61616	-1.1483	-2.53009	0.0421276
CD19	chrX:48801700:48802200	chrX	48801700	48802200	+	promoter-TSS (NM_001321229)	promoter-TSS (NM_001321229)	1	NM_001321229	0.102	501	66	7.87958	NA	8.10672	7.84592	7.60159	7.69036	7.97424	7.21833	7.67209	0.435025	2.53446	0.041871
CD19	chrX:78103955:78104342	chrX	78103955	78104342	+	promoter-TSS (NM_000291)	promoter-TSS (NM_000291)	-21	NM_000291	0.118863	388	68	7.08309	NA	7.00886	6.84244	7.24775	7.25139	7.07396	7.50323	7.30477	-0.383647	-3.02958	0.0212283

## Sheet: Supp.Tab.2-TF.Enrichment
Cell-Type	tf.diff	tf.not.diff	diff.bound	diff.not.bound	p.value	Estimate	TF.Name
CD4	5	41	101	5157	0.00207252	6.22133	ZNF17
CD4	21	561	85	4637	0.00675001	2.04175	ZNF134
CD4	12	255	94	4943	0.0105588	2.47395	ZNF555
CD4	21	615	85	4583	0.0219096	1.84079	ZNF91
CD4	38	1333	68	3865	0.0243315	1.62013	EGR1
CD4	5	87	101	5111	0.0362156	2.90726	ZNF425
CD4	6	127	100	5071	0.0493149	2.39512	ZNF208
CD14	1	8	12	2876	0.0397231	29.7136	ZNF230
CD19	2	10	201	10331	0.0214415	10.2749	ZNF525

## Sheet: Supp.Tab.3-Diff.Exp.All
Cell_Type	Genes	logFC	t.stat	p.value	adj.P.Val	ensembl_gene_id	start_position	end_position	gene_biotype	description	Chr	%GC	1.RNA	2.RNA	3.RNA	4.RNA	6.RNA	8.RNA	9.RNA	10.RNA	11.RNA	12.RNA
CD4	AKT1S1	0.290171	3.81471	0.00410871	0.199924	ENSG00000204673	49869033	49878459	protein_coding	AKT1 substrate 1 [Source:HGNC Symbol;Acc:HGNC:28426]	19	59.67	4.46393	4.2542	4.69729	4.49271	4.83077	4.22079	4.33489	4.586	4.32286	4.4222
CD4	BAD	0.376428	3.77831	0.00434529	0.206401	ENSG00000002330	64269830	64284704	protein_coding	BCL2 associated agonist of cell death [Source:HGNC Symbol;Acc:HGNC:936]	11	53.92	3.46254	3.16583	3.79171	3.70958	3.67856	3.03689	3.24986	3.57623	3.39672	3.46729
CD4	C12orf43	0.230872	4.06916	0.00279199	0.181776	ENSG00000157895	121000486	121016502	protein_coding	chromosome 12 open reading frame 43 [Source:HGNC Symbol;Acc:HGNC:25719]	12	49.65	4.53655	4.28592	4.5498	4.68502	4.61831	4.30061	4.33712	4.55946	4.46085	4.39283
CD4	C16orf54	-0.541564	-4.35551	0.00182711	0.158482	ENSG00000185905	29742463	29745990	protein_coding	chromosome 16 open reading frame 54 [Source:HGNC Symbol;Acc:HGNC:26649]	16	56.6	7.66031	8.39034	7.60925	7.98951	7.83428	8.05366	8.59534	7.87881	8.15768	8.52465
CD4	C19orf71	0.528623	3.94685	0.0033581	0.189347	ENSG00000183397	3539154	3544030	protein_coding	chromosome 19 open reading frame 71 [Source:HGNC Symbol;Acc:HGNC:34496]	19	56.26	3.12016	3.13814	4.11218	4.05384	4.44506	3.82247	3.07891	4.06202	2.99915	3.66748
CD4	C1QTNF6	0.60304	5.90743	0.000225267	0.056176	ENSG00000133466	37180166	37199385	protein_coding	C1q and TNF related 6 [Source:HGNC Symbol;Acc:HGNC:14343]	22	50.65	4.66839	4.13988	5.05019	5.128	5.02973	4.45295	4.1979	5.20605	4.53606	4.58759
CD4	C3orf62	0.340334	4.67415	0.00115579	0.132489	ENSG00000188315	49268596	49277232	protein_coding	chromosome 3 open reading frame 62 [Source:HGNC Symbol;Acc:HGNC:24771]	3	47.93	5.27289	4.9076	5.36485	5.14756	5.33383	4.97664	4.8414	5.1662	5.05217	4.78866
CD4	CAMKK2	-0.34333	-3.8914	0.00365368	0.193796	ENSG00000110931	121237675	121298308	protein_coding	calcium/calmodulin dependent protein kinase kinase 2 [Source:HGNC Symbol;Acc:HGNC:1470]	12	50.83	4.82453	5.39041	4.80791	4.99658	4.77543	5.36048	5.17392	5.03158	5.18881	5.04886
CD4	CCDC114	0.76904	5.1832	0.000573342	0.0923332	ENSG00000105479	48296457	48321894	protein_coding	coiled-coil domain containing 114 [Source:HGNC Symbol;Acc:HGNC:26560]	19	52.38	1.72514	0.791759	1.90082	1.72228	1.39165	0.822915	1.12573	2.0184	1.47088	0.837984
CD4	CLPP	0.362767	4.55065	0.00137787	0.137442	ENSG00000125656	6361531	6368906	protein_coding	caseinolytic mitochondrial matrix peptidase proteolytic subunit [Source:HGNC Symbol;Acc:HGNC:2084]	19	54	5.52871	5.41357	5.86577	5.57338	5.90726	5.31953	5.22331	5.64918	5.26846	5.40209
CD4	CPEB4	0.202618	3.82453	0.00404723	0.199924	ENSG00000113742	173888349	173961980	protein_coding	cytoplasmic polyadenylation element binding protein 4 [Source:HGNC Symbol;Acc:HGNC:21747]	5	37.29	5.29653	5.12538	5.28952	5.22591	5.08204	4.94865	4.99369	5.15979	5.00826	5.02929
CD4	DTYMK	0.288665	4.17396	0.00238745	0.181776	ENSG00000168393	241675747	241686944	protein_coding	deoxythymidylate kinase [Source:HGNC Symbol;Acc:HGNC:3061]	2	51.06	4.11741	3.85682	4.18179	4.18013	4.13452	3.69624	3.88615	4.04809	4.05266	3.77621
CD4	EFNA3	-0.549536	-6.08978	0.000180058	0.0529755	ENSG00000143590	155078837	155087538	protein_coding	ephrin A3 [Source:HGNC Symbol;Acc:HGNC:3223]	1	63.3	0.374622	1.101	0.54375	0.69582	1.11756	1.18217	1.09105	0.737571	1.3034	1.34938
CD4	FBXL18	-0.299146	-4.02232	0.00299578	0.184397	ENSG00000155034	5431335	5513809	protein_coding	F-box and leucine rich repeat protein 18 [Source:HGNC Symbol;Acc:HGNC:21874]	7	54.7	3.28175	3.85334	3.3072	3.20352	3.23871	3.42884	3.71474	3.31797	3.56329	3.39509
CD4	FEM1A	-0.379486	-4.09639	0.00268032	0.181776	ENSG00000141965	4791681	4801273	protein_coding	fem-1 homolog A [Source:HGNC Symbol;Acc:HGNC:16934]	19	55.19	5.41534	5.98292	5.16716	5.40543	5.53662	5.68372	5.74499	5.38055	5.60139	5.784
CD4	FUCA1	-0.46086	-6.47151	0.000114224	0.0529755	ENSG00000179163	23845077	23868294	protein_coding	alpha-L-fucosidase 1 [Source:HGNC Symbol;Acc:HGNC:4006]	1	45.7	3.6149	4.37164	3.78043	3.79931	3.60645	4.07282	4.22762	3.76538	4.08898	4.16639
CD4	GNA15	-0.514822	-6.42887	0.000120073	0.0529755	ENSG00000060558	3136193	3163769	protein_coding	G protein subunit alpha 15 [Source:HGNC Symbol;Acc:HGNC:4383]	19	52.55	2.15602	2.63749	1.95392	2.11336	2.02448	2.52859	2.73751	1.84188	2.40596	2.43192
CD4	HIBCH	-0.316085	-5.31055	0.000483916	0.0923332	ENSG00000198130	190189735	190344193	protein_coding	3-hydroxyisobutyryl-CoA hydrolase [Source:HGNC Symbol;Acc:HGNC:4908]	2	38.94	3.7825	4.15039	3.61862	3.81679	3.74841	4.08142	4.01873	3.85334	4.06923	4.07713
CD4	ID3	-0.980083	-5.0483	0.000687879	0.0980228	ENSG00000117318	23557926	23559501	protein_coding	inhibitor of DNA binding 3, HLH protein [Source:HGNC Symbol;Acc:HGNC:5362]	1	57.04	3.63085	4.87367	3.41997	4.24908	3.80422	4.91459	5.00872	3.86037	4.18989	4.83857
CD4	LPAR2	0.342277	4.01039	0.00305018	0.184397	ENSG00000064547	19623655	19628930	protein_coding	lysophosphatidic acid receptor 2 [Source:HGNC Symbol;Acc:HGNC:3168]	19	58.93	6.27451	6.21993	6.33735	6.25574	6.44399	5.87724	6.17515	6.45316	5.94284	5.89118
CD4	LRRC56	0.495547	4.22798	0.00220369	0.177296	ENSG00000161328	537527	554912	protein_coding	leucine rich repeat containing 56 [Source:HGNC Symbol;Acc:HGNC:25430]	11	59.96	3.15507	2.53474	3.34898	3.19821	3.53766	3.09869	2.13967	3.43362	2.95086	3.16128
CD4	MDK	0.785092	6.82855	7.585e-05	0.0529755	ENSG00000110492	46380756	46383837	protein_coding	midkine [Source:HGNC Symbol;Acc:HGNC:6972]	11	66.26	3.16928	2.18399	3.20624	2.98522	3.19643	2.09929	2.70771	3.05419	2.26697	2.49793
CD4	MIR210HG	1.07152	4.5578	0.00136382	0.137442	ENSG00000247095	565660	568457	lincRNA	MIR210 host gene [Source:HGNC Symbol;Acc:HGNC:39524]	11	61.54	1.81437	0.219511	1.76149	1.15127	1.20431	1.12573	0.51582	1.64553	-0.0811208	0.410877
CD4	MLEC	-0.239936	-4.22247	0.00222175	0.177296	ENSG00000110917	120687149	120701859	protein_coding	malectin [Source:HGNC Symbol;Acc:HGNC:28973]	12	47.26	7.04944	7.18887	6.76985	6.95607	6.69981	7.05732	7.19738	6.89101	7.17027	7.05591
CD4	MOB3A	-0.313949	-5.14729	0.00060167	0.0923332	ENSG00000172081	2071036	2096673	protein_coding	MOB kinase activator 3A [Source:HGNC Symbol;Acc:HGNC:29802]	19	55.69	7.51153	7.84212	7.28937	7.35664	7.28658	7.49753	7.69813	7.24154	7.70405	7.61645
CD4	NUAK2	-0.61418	-5.65478	0.000309509	0.0686079	ENSG00000163545	205302059	205321791	protein_coding	NUAK family kinase 2 [Source:HGNC Symbol;Acc:HGNC:29558]	1	51.28	5.31074	6.12746	5.57463	5.63004	5.36658	6.29442	6.20381	5.85085	6.02678	6.12573
CD4	PAQR6	0.335412	5.19302	0.000565845	0.0923332	ENSG00000160781	156243320	156248117	protein_coding	progestin and adipoQ receptor family member 6 [Source:HGNC Symbol;Acc:HGNC:30132]	1	60.94	2.42762	1.98285	2.28633	2.40191	2.50584	1.97045	2.16616	2.39937	2.10623	2.11848
CD4	PIGQ	0.224961	4.06143	0.0028246	0.181776	ENSG00000007541	566995	584136	protein_coding	phosphatidylinositol glycan anchor biosynthesis class Q [Source:HGNC Symbol;Acc:HGNC:14135]	16	64.36	5.06579	4.73088	4.94412	5.02442	4.94962	4.69872	4.76571	4.88516	4.72431	4.84519
CD4	PSMD6,AS2	0.868926	4.65035	0.00119539	0.132489	ENSG00000239653	64004022	64012148	antisense	PSMD6 antisense RNA 2 [Source:HGNC Symbol;Acc:HGNC:44125]	3	38.82	6.35599	5.72347	7.11316	6.39588	6.89222	5.47882	5.80232	6.34728	6.11774	5.63544
CD4	PYGO2	-0.29391	-4.1057	0.00264321	0.181776	ENSG00000163348	154957026	154963853	protein_coding	pygopus family PHD finger 2 [Source:HGNC Symbol;Acc:HGNC:30257]	1	54.77	7.34285	7.69813	7.10739	7.27508	7.28086	7.59522	7.61278	7.41568	7.4892	7.51841
CD4	RHBDL1	1.10028	4.37176	0.0017843	0.158482	ENSG00000103269	675666	678268	protein_coding	rhomboid like 1 [Source:HGNC Symbol;Acc:HGNC:10007]	16	68.27	2.47264	1.75605	1.77251	2.73447	2.66555	0.971458	2.0395	2.93113	1.26537	1.21894
CD4	RSC1A1	0.397993	4.71917	0.00108466	0.132489	ENSG00000215695	15659869	15661722	protein_coding	regulator of solute carriers 1 [Source:HGNC Symbol;Acc:HGNC:10458]	1	42.83	5.23046	4.91226	5.40668	5.21969	5.53254	4.83031	5.13943	5.3464	4.91602	4.9422
CD4	SBDSP1	0.416728	3.83603	0.00397649	0.199924	ENSG00000225648	72829425	72836701	transcribed_unprocessed_pseudogene	SBDS, ribosome maturation factor pseudogene 1 [Source:HGNC Symbol;Acc:HGNC:21646]	7	43.81	7.02542	6.35445	6.70088	6.79603	7.00018	6.63809	6.28662	6.69533	6.58615	6.2171
CD4	SERTAD1	-0.549704	-4.92583	0.000813417	0.108184	ENSG00000197019	40421589	40425992	protein_coding	SERTA domain containing 1 [Source:HGNC Symbol;Acc:HGNC:17932]	19	52.5	3.06552	3.22409	2.56803	2.88672	2.76977	3.12272	3.54402	2.78805	3.47763	3.54702
CD4	SPTLC2	-0.262049	-4.08716	0.00271763	0.181776	ENSG00000100596	77505997	77616773	protein_coding	serine palmitoyltransferase long chain base subunit 2 [Source:HGNC Symbol;Acc:HGNC:11278]	14	41.35	5.789	5.96738	5.71042	5.86074	5.65326	6.05135	6.15787	5.88559	6.1015	5.97493
CD4	TNFSF14	-0.770374	-4.47182	0.00154322	0.146606	ENSG00000125735	6661253	6670588	protein_coding	TNF superfamily member 14 [Source:HGNC Symbol;Acc:HGNC:11930]	19	51.37	3.83644	4.17051	2.79828	3.25338	3.20447	3.86104	4.12799	3.05873	3.78317	4.19565
CD4	UPF1	-0.188738	-3.93544	0.00341678	0.189347	ENSG00000005007	18831938	18868236	protein_coding	UPF1, RNA helicase and ATPase [Source:HGNC Symbol;Acc:HGNC:9962]	19	55.16	7.03048	7.22038	6.97708	7.01079	7.0444	7.20583	7.21678	7.12108	7.26677	7.21549
CD4	YPEL2	0.442591	6.16975	0.000163433	0.0529755	ENSG00000175155	59331655	59401729	protein_coding	yippee like 2 [Source:HGNC Symbol;Acc:HGNC:18326]	17	46.63	6.27031	5.92471	6.28421	6.22489	6.66287	5.95444	5.83611	6.44451	5.954	5.90303
CD4	ZBTB7A	-0.440588	-6.0955	0.00017881	0.0529755	ENSG00000178951	4043303	4066899	protein_coding	zinc finger and BTB domain containing 7A [Source:HGNC Symbol;Acc:HGNC:18078]	19	61.71	5.28603	5.90303	5.13706	5.23546	5.19916	5.67032	5.6182	5.26846	5.57633	5.59509
CD4	ZNF286B	0.416799	3.88468	0.00369135	0.193796	ENSG00000249459	18658429	18682262	protein_coding	zinc finger protein 286B [Source:HGNC Symbol;Acc:HGNC:33241]	17	42.4	3.14423	2.78417	3.0737	3.27169	3.34231	2.87694	2.37184	3.26751	3.08066	2.77595
CD4	ZNF57	-0.780802	-3.94669	0.00335888	0.189347	ENSG00000171970	2900898	2918473	protein_coding	zinc finger protein 57 [Source:HGNC Symbol;Acc:HGNC:13125]	19	46.27	1.81676	2.32472	1.21131	2.0395	1.77519	2.6029	2.33869	1.15127	1.96634	2.57154
CD4	ZNF574	-0.637427	-6.06366	0.000185879	0.0529755	ENSG00000105732	42068477	42081552	protein_coding	zinc finger protein 574 [Source:HGNC Symbol;Acc:HGNC:26166]	19	57	4.06683	4.79317	3.83018	4.17642	4.26521	4.67903	4.87267	4.38011	4.67391	4.85947
CD8	DDIT4	1.50856	5.10455	0.000625514	0.17014	ENSG00000168209	72273924	72276036	protein_coding	DNA damage inducible transcript 4 [Source:HGNC Symbol;Acc:HGNC:24944]	10	58.64	8.62377	7.06619	9.39057	7.77268	8.91923	7.28473	7.18401	8.23291	7.24319	6.61684
CD8	KRT72	-0.976255	-5.42158	0.000409632	0.17014	ENSG00000170486	52585589	52601538	protein_coding	keratin 72 [Source:HGNC Symbol;Acc:HGNC:28932]	12	46.6	4.78572	5.86783	5.238	5.48826	6.21891	7.08549	6.26549	5.3703	6.18417	6.11142
CD19	HDHD3	-0.795658	-7.8998	2.49148e-05	0.0761148	ENSG00000119431	113373419	113376999	protein_coding	haloacid dehalogenase like hydrolase domain containing 3 [Source:HGNC Symbol;Acc:HGNC:28171]	9	54.87	5.47896	6.41219	5.30539	5.46327	5.3081	5.962	6.19954	5.40234	6.11913	6.32563
CD19	SMG8	-0.633319	-6.31912	0.000139662	0.213334	ENSG00000167447	59209400	59215247	protein_coding	SMG8, nonsense mediated mRNA decay factor [Source:HGNC Symbol;Acc:HGNC:25551]	17	44.25	5.07479	5.544	4.89517	5.0325	5.09715	5.66153	5.83769	5.18285	5.59538	5.79864

## Sheet: Supp.Tab.4-RNA.ATAC.Overlap
Cell-Type	ATAC_ID	Gene	Ensemble.CD4	distance	chr	start.atac	end.atac	start.RNA	end.RNA	Corr.RR.CD4	Corr.RR.CD4.pval	Corr.HC.CD4	Corr.HC.CD4.pval	Corr.ALL.CD4	Corr.ALL.CD4.pval
CD4	chr12:120317550:120317885	MLEC	MLEC	369599	chr12	120317550	120317885	120687149	120701859	-0.8	0.333333	-0.872082	0.0538542	-0.932337	0.000248221
CD4	chr7:5397108:5397496	FBXL18	FBXL18	34227	chr7	5397108	5397496	5431335	5513809	-0.2	0.916667	-0.9	0.0833333	-0.916667	0.00131173
CD4	chr12:120317550:120317885	CAMKK2	CAMKK2	920125	chr12	120317550	120317885	121237675	121298308	-1	0.0833333	-0.46169	0.433766	-0.881483	0.00167742
CD4	chr1:23344215:23344541	FUCA1	FUCA1	500862	chr1	23344215	23344541	23845077	23868294	-0.4	0.75	-0.894427	0.0405193	-0.879092	0.00179449
CD4	chr22:37844290:37844650	C1QTNF6	C1QTNF6	-664124	chr22	37844290	37844650	37180166	37199385	-0.4	0.75	0.974679	0.00481823	0.878669	0.0018158
CD4	chr19:6767390:6767757	TNFSF14	TNFSF14	-106137	chr19	6767390	6767757	6661253	6670588	-0.2	0.916667	-0.8	0.133333	-0.865577	0.00256467
CD4	chr17:59892896:59893262	YPEL2	YPEL2	-561241	chr17	59892896	59893262	59331655	59401729	0.8	0.333333	0.223607	0.717686	0.864531	0.00263237
CD4	chr19:49500769:49501271	AKT1S1	AKT1S1	368264	chr19	49500769	49501271	49869033	49878459	0.8	0.333333	0.0512989	0.934713	0.828459	0.00579537
CD4	chr12:121839520:121839796	C12orf43	C12orf43	-839034	chr12	121839520	121839796	121000486	121016502	-0.4	0.75	0.666886	0.218894	0.828459	0.00579537
CD4	chr3:49094171:49094602	C3orf62	C3orf62	174425	chr3	49094171	49094602	49268596	49277232	-0.316228	0.683772	1	0.0166667	0.828459	0.00579537
CD4	chr7:73738787:73739137	SBDSP1	SBDSP1	-909362	chr7	73738787	73739137	72829425	72836701	-0.4	0.75	0.666886	0.218894	0.828459	0.00579537
CD4	chr1:23344215:23344541	ID3	ID3	213711	chr1	23344215	23344541	23557926	23559501	-0.4	0.75	-0.447214	0.450185	-0.826869	0.00597575
CD4	chr19:2151524:2151893	ZNF57	ZNF57	749374	chr19	2151524	2151893	2900898	2918473	-0.6	0.416667	-0.102598	0.869598	-0.820091	0.00678753
CD4	chr12:121839520:121839796	CAMKK2	CAMKK2	-601845	chr12	121839520	121839796	121237675	121298308	0.6	0.416667	-0.666886	0.218894	-0.811723	0.0078893
CD4	chr1:205813073:205813421	NUAK2	NUAK2	-511014	chr1	205813073	205813421	205302059	205321791	0.4	0.75	-0.410391	0.492536	-0.786618	0.0119092
CD4	chr12:120317550:120317885	C12orf43	C12orf43	682936	chr12	120317550	120317885	121000486	121016502	0.4	0.75	0.410391	0.492536	0.779773	0.0132052
CD4	chr1:155562664:155563038	PAQR6	PAQR6	680656	chr1	155562664	155563038	156243320	156248117	0.4	0.75	0.6	0.35	0.778249	0.013506
CD4	chr16:1025228:1025604	RHBDL1	RHBDL1	-349562	chr16	1025228	1025604	675666	678268	0.2	0.916667	0.5	0.45	0.8	0.0138283
CD4	chr1:15617315:15617686	RSC1A1	RSC1A1	42554	chr1	15617315	15617686	15659869	15661722	0	1	0.6	0.35	0.769881	0.0152402
CD4	chr11:507120:507574	LRRC56	LRRC56	30407	chr11	507120	507574	537527	554912	0.8	0.333333	-0.111803	0.857945	0.74587	0.0210263
CD4	chr11:507120:507574	MIR210HG	MIR210HG	58540	chr11	507120	507574	565660	568457	-0.8	0.333333	0.33541	0.581091	0.74587	0.0210263
CD4	chr19:2151524:2151893	GNA15	GNA15	984669	chr19	2151524	2151893	3136193	3163769	-0.6	0.416667	0.410391	0.492536	-0.736408	0.0236554
CD4	chr19:40425773:40426232	SERTAD1	SERTAD1	-4184	chr19	40425773	40426232	40421589	40425992	0.4	0.75	-0.1	0.95	-0.733333	0.0311232
CD4	chr17:18314915:18315279	ZNF286B	ZNF286B	343514	chr17	18314915	18315279	18658429	18682262	0.8	0.333333	-0.3	0.683333	0.733333	0.0311232
CD4	chr19:2151524:2151893	MOB3A	MOB3A	-80488	chr19	2151524	2151893	2071036	2096673	0	1	-0.0512989	0.934713	-0.702935	0.0346701
CD4	chr19:4342676:4343043	FEM1A	FEM1A	449005	chr19	4342676	4343043	4791681	4801273	0.4	0.75	0.153897	0.804829	-0.694567	0.0378641
CD4	chr19:1490755:1491085	MOB3A	MOB3A	580281	chr19	1490755	1491085	2071036	2096673	-0.4	0.75	-0.1	0.95	-0.7	0.043254
CD4	chr19:48321856:48322235	CCDC114	CCDC114	-25399	chr19	48321856	48322235	48296457	48321894	0.105409	0.894591	0.3	0.683333	0.669462	0.0485682
CD4	chr2:190880600:190880953	HIBCH	HIBCH	-690865	chr2	190880600	190880953	190189735	190344193	-0.6	0.416667	-0.2	0.783333	-0.669462	0.0485682
CD4	chr19:40465716:40466203	SERTAD1	SERTAD1	-44127	chr19	40465716	40466203	40421589	40425992	1	0.0833333	-0.5	0.45	-0.683333	0.0503197
